1 **Cognitive boundary signals in the human medial temporal lobe shape episodic**  
2 **memory representation**

3

4 Jie Zheng<sup>1</sup>, Andrea Gómez Palacio Schjetnan<sup>2</sup>, Mar Yebra<sup>3</sup>, Clayton Mosher<sup>3</sup>, Suneil Kalia<sup>2</sup>,

5 Taufik A. Valiante<sup>2</sup>, Adam N., Mamelak<sup>3</sup>, Gabriel Kreiman<sup>1,5,\*</sup>, Ueli Rutishauser<sup>3,4,6,\*</sup>

6

7 <sup>1</sup> Department of Ophthalmology, Children's Hospital, Harvard Medical School, Boston, MA, USA

8 <sup>2</sup> Krembil Research Institute, University Health Network (UHN), Toronto, ON, Canada

9 <sup>3</sup> Department of Neurosurgery, Cedars-Sinai Medical Center, Los Angeles, CA, USA

10 <sup>4</sup> Department of Neurology, Cedars-Sinai Medical Center, Los Angeles, CA, USA

11 <sup>5</sup> Center for Brain Science, Harvard University, Cambridge, MA, USA

12 <sup>6</sup> Division of Biology and Biological Engineering, California Institute of Technology, Pasadena,

13 CA, USA

14 \* Senior authors

15

16 **Abstract**

17 While experience unfolds continuously, memories are organized as a set of discrete events that  
18 bind together the “where”, “when”, and “what” of episodic memory. This segmentation of  
19 continuous experience is thought to be facilitated by the detection of salient environmental or  
20 cognitive events. However, the underlying neural mechanisms and how such segmentation  
21 shapes episodic memory representations remain unclear. We recorded from single neurons in  
22 the human medial temporal lobe while subjects watched videos with different types of embedded  
23 boundaries and were subsequently evaluated for memories of the video contents. Here we show  
24 neurons that signal the presence of cognitive boundaries between subevents from the same  
25 episode and neurons that detect the abstract separation between different episodes. The firing  
26 rate and spike timing of these boundary-responsive neurons were predictive of later memory  
27 retrieval accuracy. At the population level, abrupt neural state changes following boundaries  
28 predicted enhanced memory strength but impaired order memory, capturing the behavioral  
29 tradeoff subjects exhibited when recalling episodic content versus temporal order. Successful  
30 retrieval was associated with reinstatement of the neural state present following boundaries,  
31 indicating that boundaries structure memory search. These findings reveal a neuronal substrate  
32 for detecting cognitive boundaries and show that cognitive boundary signals facilitate the  
33 mnemonic organization of continuous experience as a set of discrete episodic events.

34

| 35

## 36 Introduction

37 Our lives unfold over time, weaving rich, dynamic, and multisensory information into a  
38 continuous sequence of experiences. However, our memories are not continuous. Rather, what  
39 we remember are discrete episodes (“events”)<sup>1</sup>, which serve as anchors to bind together the  
40 myriad different aspects (where, when, what) of a given autobiographical memory<sup>2</sup> much like  
41 objects do in perception<sup>3</sup>. For instance, the mnemonic representation of a movie consists mainly  
42 of a set of salient moments, disregarding large amounts of other information and irrespective of  
43 their temporal order in the original movie<sup>4</sup>. A fundamental unresolved question in human memory  
44 is, therefore: what marks the beginning and the end of an episode?

45 The transformation from ongoing experience to distinct events is thought to rely on the  
46 identification of boundaries that separate two events<sup>1,5-9</sup>. Neuroimaging studies in humans  
47 indicate that neural activity in the medial temporal lobe (MTL), in particular in the hippocampus  
48 and parahippocampal gyrus, changes around the occurrence of cognitive boundaries and the  
49 extent of such changes is related to later memory performance<sup>10,11</sup>. However, due to the low  
50 temporal and spatial precision, it remains unclear how exactly these responses are related to  
51 abstract cognitive boundaries, when these responses occur, and what the mechanisms of their  
52 generation are. In rodents, much has been learned from studying the neural responses to spatial  
53 boundaries and the ways by which these responses shape mnemonic representations. For  
54 example, neurons in the rodent hippocampus elevate their firing rates in the vicinity of  
55 investigator-imposed spatial boundaries<sup>12</sup>, with the place fields of hippocampal neurons shaped  
56 by physical boundaries like turns<sup>13</sup> and walls<sup>14,15</sup>. In accordance with the boundaries of  
57 subenvironments<sup>12</sup>, hippocampal place fields remap<sup>16,17</sup> in response to context shifts (e.g., enter  
58 a new compartment) and are reinstated<sup>13,18</sup> when placed back to a familiar context. Additionally,  
59 rodent MTL neuron ensembles encode event-specific representations irrespective of an animal’s  
60 spatial location<sup>19</sup>, presumably representing cognitive boundaries between distinct events.  
61 Together, boundaries shape mnemonic representations of both spatial environments and the

62 events that occur along the way, and structure the neural basis (i.e., place fields and event-  
63 specific representations) of cognitive maps. However, no such understanding exists yet for the  
64 non-spatial episodic memories that define us as individual human beings<sup>2,20</sup>.

65 We investigated the neuronal mechanisms underlying the identification of event  
66 boundaries in humans under relatively realistic continuous experience. We recorded single  
67 neuron activity from 20 patients with drug-resistant epilepsy with implanted depth electrodes<sup>21</sup>  
68 while testing their memory for the content of video clips with two different kinds of embedded  
69 cognitive boundaries: soft and hard boundaries. Soft boundaries are episodic transitions between  
70 related events within the same movie, while hard boundaries are episodic transitions between  
71 unrelated events from two unrelated movies. Behaviorally, we found that both soft and hard  
72 boundaries enhanced recognition of video clip content that followed a boundary, whereas hard  
73 boundaries impaired memory of the temporal order between events. This tradeoff is compatible  
74 with the segmentation of experience into distinct episodes. Neuronally, we characterized the  
75 properties of neurons in the medial temporal lobe that signaled the presence of boundaries. The  
76 activity of these boundary responsive neurons predicted memory strength as assessed by scene  
77 recognition and temporal order discrimination accuracy.

78

## 79 **Results**

80 We studied how boundaries influence the formation and retrieval of memories of brief  
81 video clips. Twenty patients with drug-resistant epilepsy implanted with hybrid depth electrodes  
82 for localizing their seizure foci performed the task while we recorded the activity of single neurons  
83 (Fig. 1e; Extended Data Tables 2 and 3 show electrode locations and patient demographics). The  
84 task consisted of three parts: encoding, scene recognition, and time discrimination. During  
85 encoding (Fig. 1a), subjects watched 90 different and novel video clips containing either no  
86 boundaries (NB, one continuous movie shot), soft boundaries (SB, cuts to a new scene within the  
87 same movie), or hard boundaries (HB, cuts to a new scene from a different movie; See Fig. 1b

88 and Extended Data Fig. 1 for examples of the different types of boundaries). Differentiating  
89 between SB and HB required cognitive understanding of movie content because visual features  
90 (Extended Data Table 1) did not differentiate between these two types of boundaries. To ensure  
91 subjects' engagement during encoding, a memory question (e.g., is anyone in the clip wearing  
92 glasses?) appeared every four to eight clips. Subjects answered  $89 \pm 5\%$  of these questions  
93 accurately.

94 We subsequently evaluated what subjects remembered about the video clips with two  
95 memory tests: scene recognition (Fig. 1c) and time discrimination (Fig. 1d). During the scene  
96 recognition test, subjects were presented with individual static frames. These frames were chosen  
97 with equal probability from either the previously presented NB, SB, and HB video clips ("targets")  
98 or from other video clips that were not shown to the subjects ("foils"). Subjects made an "old" or  
99 "new" decision together with a confidence rating (sure, less sure and very unsure) for each. During  
100 the time discrimination test, subjects were shown two old frames from the video clips side-by-side  
101 (Fig. 1d) and had to indicate which frame was seen earlier in time together with a confidence  
102 rating.

103

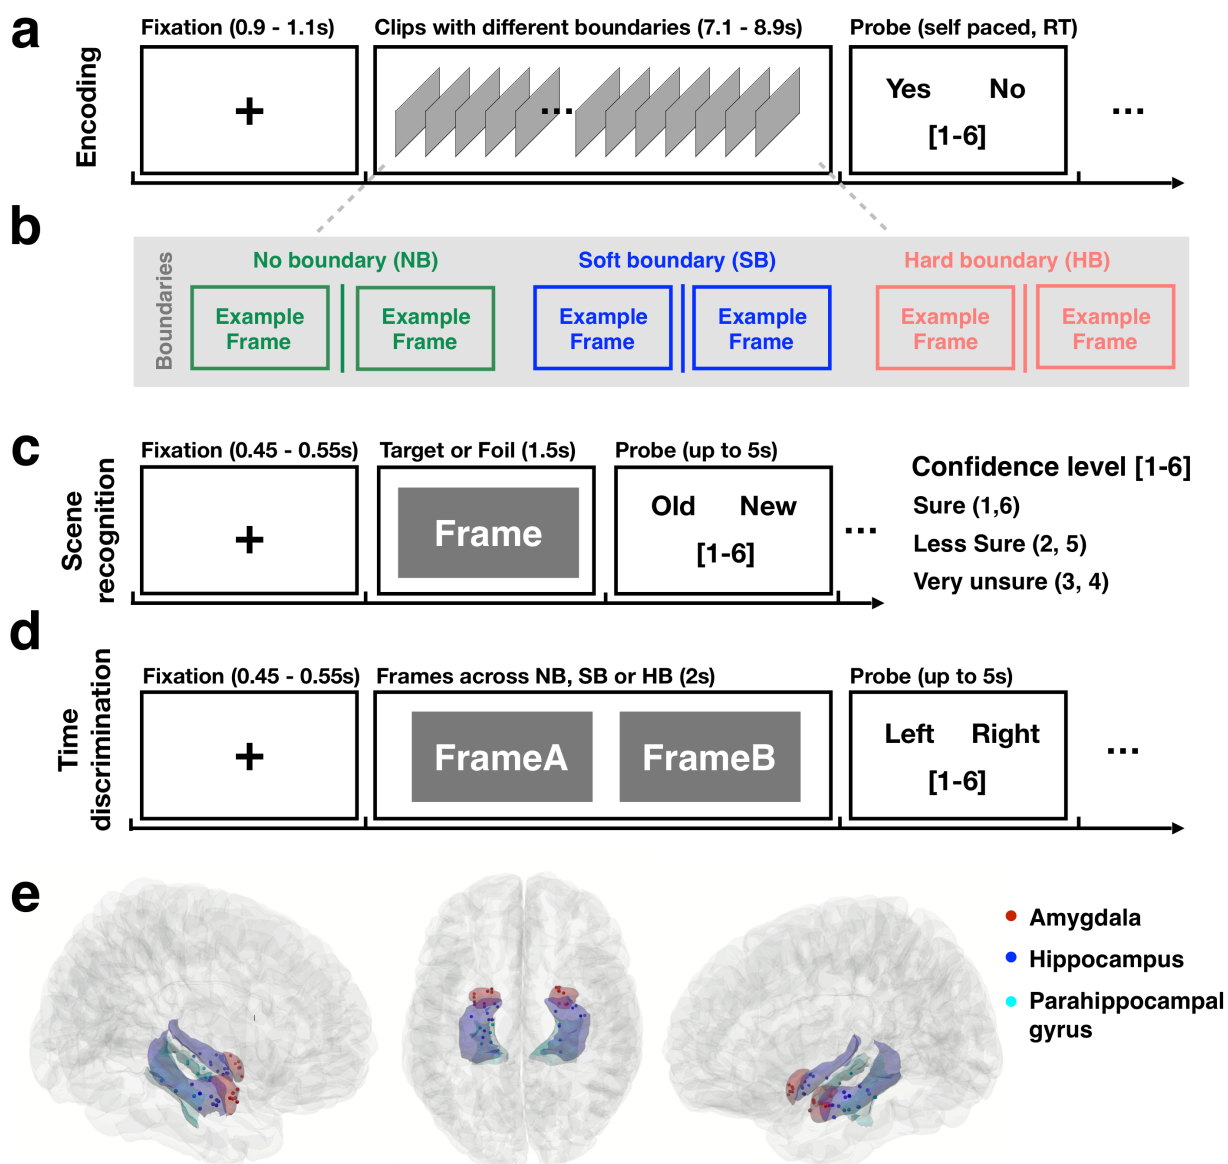

104  
 105 **Fig. 1: Experiment and recording locations.** **a.** Encoding task (example trial). Subjects watched  
 106 90 video clips (~ 8 seconds each, no audio) with either no boundary (NB, continuous movie shot),  
 107 a soft boundary (SB, cut to a new scene within the same movie, 1 to 3 SB per clip), or a hard  
 108 boundary (HB, cut to a different movie, 1 HB per clip). Every 4-8 clips, subjects were prompted to  
 109 answer a true/false question related to the clip content together with a confidence rating (see  
 110 Methods). **b.** Example boundaries (more examples in **Extended Data Fig.1**, visual features of  
 111 boundaries in **Extended Data Table 1**). Note that owing to copyright issues, all original images  
 112 have been removed but are available upon reasonable request. **c.** Recognition memory task.  
 113 Subjects indicated whether a static image was new or old (seen in the video clips), together with  
 114 a confidence judgment. **d.** Time discrimination task. Subjects indicated which of two frames they  
 115 saw first during the movie clips together with a confidence rating. **e.** Recording locations of 39  
 116 electrodes (see MNI coordinates in **Extended Data Table 2**) across all subjects (subject  
 117 information in **Extended Table 3**) in the amygdala (red), hippocampus (blue), or parahippocampal  
 118 gyrus (cyan), rendered on the Colin27 template brain<sup>14</sup>. Each dot represents the location of a  
 119 microwire bundle.

## 120 **Boundaries strengthen recognition memory but disrupt temporal order memory**

121 In the time discrimination task, subjects correctly identified which frame was shown first in  
122  $73 \pm 7\%$  and  $73 \pm 8\%$  of trials when the two frames were separated by no boundary or a soft  
123 boundary in the video clips, respectively (Fig. 2a, green and blue; both above chance of 50%; NB:  
124  $p < 0.001$ ; SB:  $p < 0.001$ ). In contrast, subjects performed significantly worse when discriminating  
125 between frames that were separated by a hard boundary (Fig. 2a, red, HB:  $53\% \pm 5\%$  vs  $73\%$  for  
126 NB and SB;  $F(2, 57) = 51.33$ ,  $p = 1.78 \times 10^{-13}$ ;  $p = 0.02$  against chance level). Subjects also showed  
127 longer reaction times (Fig 2b; HB:  $2.10 \pm 0.37$  seconds; NB:  $1.62 \pm 0.28$  seconds; SB:  $1.59 \pm 0.34$   
128 seconds;  $F(2, 57) = 14.25$ ,  $p = 9.6 \times 10^{-6}$ ) and lower confidence ratings when discriminating  
129 between two frames earlier separated by a hard boundary (Fig 2c; HB:  $1.95 \pm 0.45$ ; NB:  $2.52 \pm$   
130  $0.29$ ; SB:  $2.59 \pm 0.23$ ;  $F(2, 57) = 20.41$ ,  $p = 2.07 \times 10^{-7}$ ). This effect on RT and confidence was not  
131 driven by accuracy differences as it was observable for both correct and incorrect trials  
132 independently (see Extended Data Fig. 3).

133 Across all trials, the ability to recognize a frame as 'old' did not differ significantly between  
134 the type of boundary that preceded the frame (Extended Data Fig. 2a; NB:  $76\% \pm 10\%$ ; SB:  $75\%$   
135  $\pm 9\%$ ; HB:  $75\% \pm 8\%$ ,  $F(2, 57) = 0.07$ ,  $p = 0.94$ ). The reaction times and confidence ratings during  
136 the scene recognition task were also similar across the different types of boundaries (reaction  
137 time: Extended Data Fig. 2b; NB =  $1.47 \pm 0.18$  seconds, SB =  $1.43 \pm 0.16$  seconds, HB =  $1.49 \pm$   
138  $0.15$  seconds,  $F(2, 57) = 0.28$ ,  $p = 0.76$ ; confidence rating: Extended Data Fig. 2c; NB =  $2.60 \pm$   
139  $0.18$ , SB =  $2.60 \pm 0.20$ , HB =  $2.52 \pm 0.28$ ,  $F(2, 57) = 0.54$ ,  $p = 0.56$ ). Therefore, the impaired time  
140 discrimination ability across HB transitions was not due to differences in memory strength as  
141 measured in recognition accuracy. Even though the overall accuracy was similar among NB, SB,  
142 and HB conditions, the recognition accuracy of target frames decreased as a function of how far  
143 away in time the target frame was relative to the immediately preceding boundary. Target frames  
144 presented within 1s after a SB (accuracy =  $79\% \pm 6\%$ ) were remembered better than those further  
145 away from the boundary (Fig. 1d, blue; 1-2s:  $72\% \pm 6\%$ ; 2-3s:  $66\% \pm 9\%$ ; 3-4s:  $68\% \pm 9\%$ ;  $F(3,$

146 76) = 10.55,  $p = 7.02 \times 10^{-6}$ ). A similar effect was also present following HBs: target frames  
147 presented within 1s after a HB (accuracy = 76%  $\pm$  5%) were significantly better remembered than  
148 those farther away from the boundary (Fig. 1d, red; 1-2s: 68%  $\pm$  4%; 2-3s: 69%  $\pm$  9%; 3-4s: 67%  
149  $\pm$  10%;  $F(3, 76) = 5.47$ ,  $p = 0.002$ ). In contrast, recognition accuracy did not differ significantly as  
150 a function of time in the no boundary condition (Fig. 1d, green; 0-1s: 72%  $\pm$  5%; 1-2s: accuracy =  
151 74%  $\pm$  5%; 2-3s: accuracy = 73%  $\pm$  6%; 3-4s: accuracy = 74%  $\pm$  7%;  $F(3, 76) = 0.32$ ,  $p = 0.81$ ).  
152 The distance effects described were unidirectional because the distance to future boundaries did  
153 not influence memory performance (Extended Data Fig. 5ab). No distance effect was present for  
154 time discrimination accuracy (Extended Data Fig. 5cd).

155 Together, behavioral analysis revealed that frames that closely followed a soft or hard  
156 boundary were more likely to be later recognized. Memory for the temporal order of frames, on  
157 the other hand, was disrupted by the presence of hard boundaries. Hard boundaries were thus  
158 beneficial for recognition memory but detrimental for order memory – thereby revealing a  
159 fundamental trade-off.



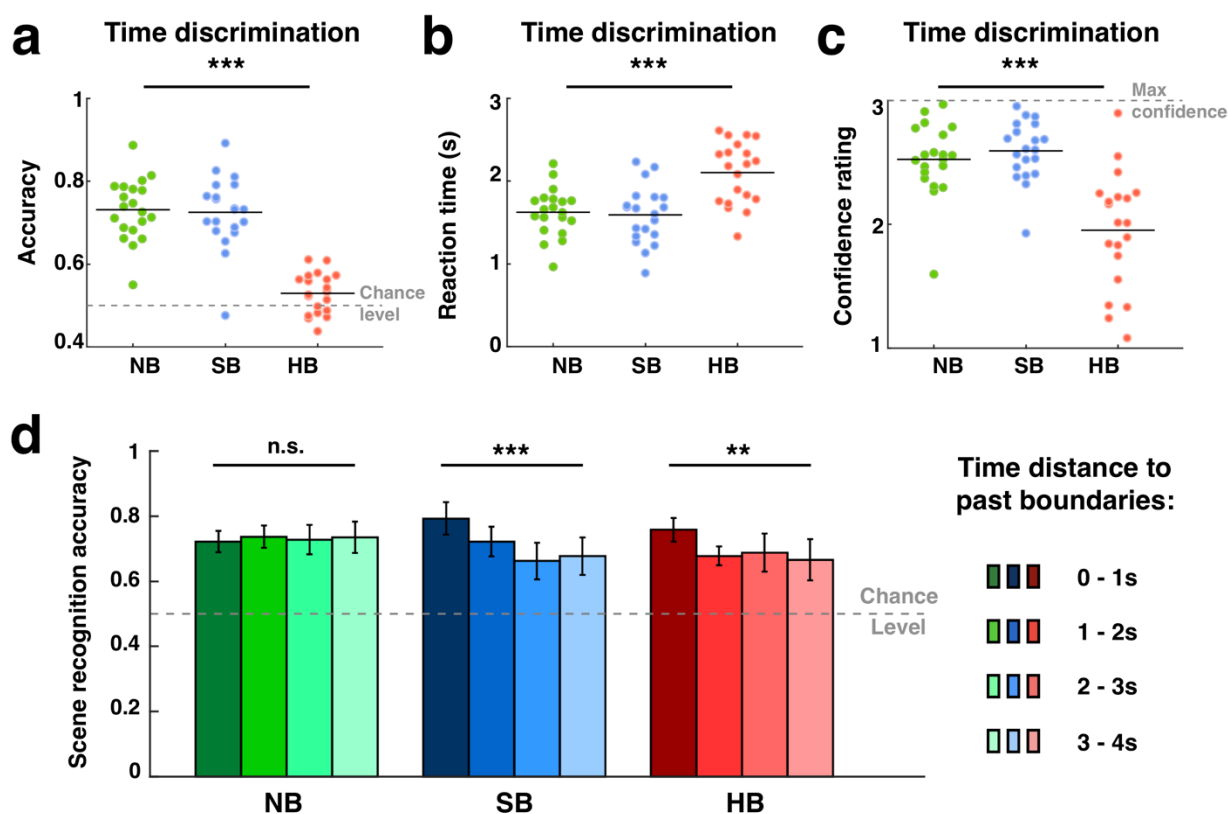

160  
 161  
 162 **Fig. 2: Behavior.** Hard boundaries impaired time discrimination while soft and hard boundaries  
 163 improved recognition memory for frames close to them. **(a-c)** Accuracy **(a)**, reaction time **(b)**, and  
 164 confidence level **(c)** across all the trials for NB (green), SB (blue), and HB (red) during the time  
 165 discrimination task (see also **Extended Data Fig. 3-4**). The horizontal dashed lines in **(a)** show  
 166 chance levels (0.5) and in **(c)** they show the maximum possible confidence rating (max = 3).  
 167 Behavior data for the scene recognition task is shown in **Extended Data Fig. 2. d**. Scene  
 168 recognition accuracy as a function of boundary type and time elapsed between the target frame  
 169 and its nearest past boundary (distance effect for time discrimination accuracy and future  
 170 boundaries shown in **Extended Data Fig. 5**). In the NB clips, we measured time with respect to  
 171 the middle of the clip. Error bars indicate standard deviation across  $n = 20$  sessions.  $**P < 0.01$ ,  
 172  $***P < 0.001$ , one-way ANOVA, degrees of freedom = (2, 57) for **(a-c)** and (3, 76) for **(d)**.

### 173 **Neurons in the medial temporal lobe demarcate episodic transitions**

174 We next investigated the neuronal responses to boundaries and their relationship to  
 175 memory by recording from neurons in the medial temporal lobe (MTL; we recorded in the  
 176 hippocampus, amygdala and parahippocampal gyrus) as well as other brain areas (Extended  
 177 Data Tables 2 and 4). Across all areas, we recorded the activity of 985 neurons (Extended Data  
 178 Fig. 6 shows spike sorting quality) from 19 subjects (1 of the 20 subjects yielded no usable  
 179 recordings, see Extended Data Table 3). We first tested whether neurons changed their activity

180 following the occurrence of boundaries by selecting for neurons that increased their response in  
181 a 1s long window following boundaries (i.e., post-boundary responses) relative to baseline (1s  
182 prior to boundary) in SB and HB trials, but not in NB trials (see Methods). Fig. 3a-b shows two of  
183 the selected neurons recorded from the parahippocampal gyrus and hippocampus, respectively.  
184 These neurons showed a transient increase in firing rates within approximately 300 milliseconds  
185 after both soft (blue) and hard (red) boundaries. We refer to this type of neuron as a boundary  
186 cell. Forty-two out of the recorded 580 MTL neurons (7.24%; chance = 2.11%) were classified as  
187 boundary cells (Fig. 3c), with the largest proportions located in the parahippocampal gyrus (n=  
188 18/68, 26.47%), followed by amygdala (n= 12/169, 7.10%) and hippocampus (n= 12/343, 3.50%;  
189 see Extended Data Table 4 for statistics).

190 Was the response of boundary cells a result of the abrupt changes in pixel-level content  
191 from the frame before to the frame after the boundary? To answer this question, we considered  
192 the responses of the cells during two other abrupt changes of visual input: video clip onset (Fig.  
193 3d) and offset (Extended Data Fig. 7). Boundary cells did not respond significantly to video clip  
194 onset or offset ( $p > 0.05$ ; permutation t-test, see Methods), showing that the boundary-related  
195 response of boundary cells is likely related to higher level cognitive discontinuities rather than  
196 pure visual changes (a question we return to below).

197 We also found a second group of neurons that transiently increased their firing rate only  
198 following hard, but not soft boundaries or no boundaries (see Methods). Two examples of such  
199 cells, located in the hippocampus and amygdala, are shown in Fig. 3e-f. We refer to this type of  
200 response as an event cell. Thirty-six out of the recorded 580 MTL neurons (6.20%; chance =  
201 2.26%) were classified as event cells (Fig. 3g), with the largest proportions located in the  
202 hippocampus (n= 27/343, 7.87%), followed by amygdala (n= 7/169, 4.27%), and  
203 parahippocampal gyrus (n= 2/68, 2.94%). Similar to boundary cells, event cells did not  
204 significantly change their firing rates ( $p > 0.05$ , permutation t-test; see Methods) following video  
205 clip onset (Fig. 3h) or offset (Extended Data Fig. 7c, f).

206           The types of transitions that we refer to as soft and hard boundaries differ in terms of their  
207 high-level conceptual narrative, which is interrupted in HBs but not in SBs. Is it possible to  
208 determine from visual features alone whether a boundary was of the soft or hard kind? To assess  
209 this question, we computed the differences between pre- and post-boundary frames in terms of  
210 pixel-level characteristics (i.e., luminance, contrast, complexity, entropy, color distribution), high-  
211 level visual features (i.e., objects), and perceptual similarity ratings. These analyses revealed that  
212 SB and HB transitions did not differ significantly from each other in any of the attributes we tested  
213 (see Extended Data Table 1). Therefore, the differential activation of event cells to HBs but not  
214 SBs is likely a result of detection of the disruption in the conceptual narrative, that is, a transition  
215 between two different episodes.

216           While both boundary and event cells responded to HB type transitions, a comparison of  
217 their response dynamics indicated that boundary cells responded to hard boundaries  
218 approximately 100 milliseconds earlier than event cells (Fig. 3i). This effect was also visible when  
219 comparing the time at which their peak response was reached: boundary cells showed a peak at  
220  $197 \pm 49$  milliseconds, whereas event cells showed a peak at  $301 \pm 55$  milliseconds (Fig. 3j;  $F(1,$   
221  $76) = 17.71, p = 7 \times 10^{-5}$ ).

222           We also selected for boundary and event cells in brain areas other than the medial  
223 temporal lobe, such as the medial frontal cortex, insula, and orbitofrontal cortex (OFC). We found  
224 8/405 (1.96%) boundary cells and 9/405 (2.22%) event cells among the non-MTL group (see  
225 Extended Data Table 4), with only event cells in the OFC exceeding the proportions expected by  
226 chance. These results show the specificity of boundary responsive neurons to the MTL; we restrict  
227 the following analyses to the MTL neurons.

228

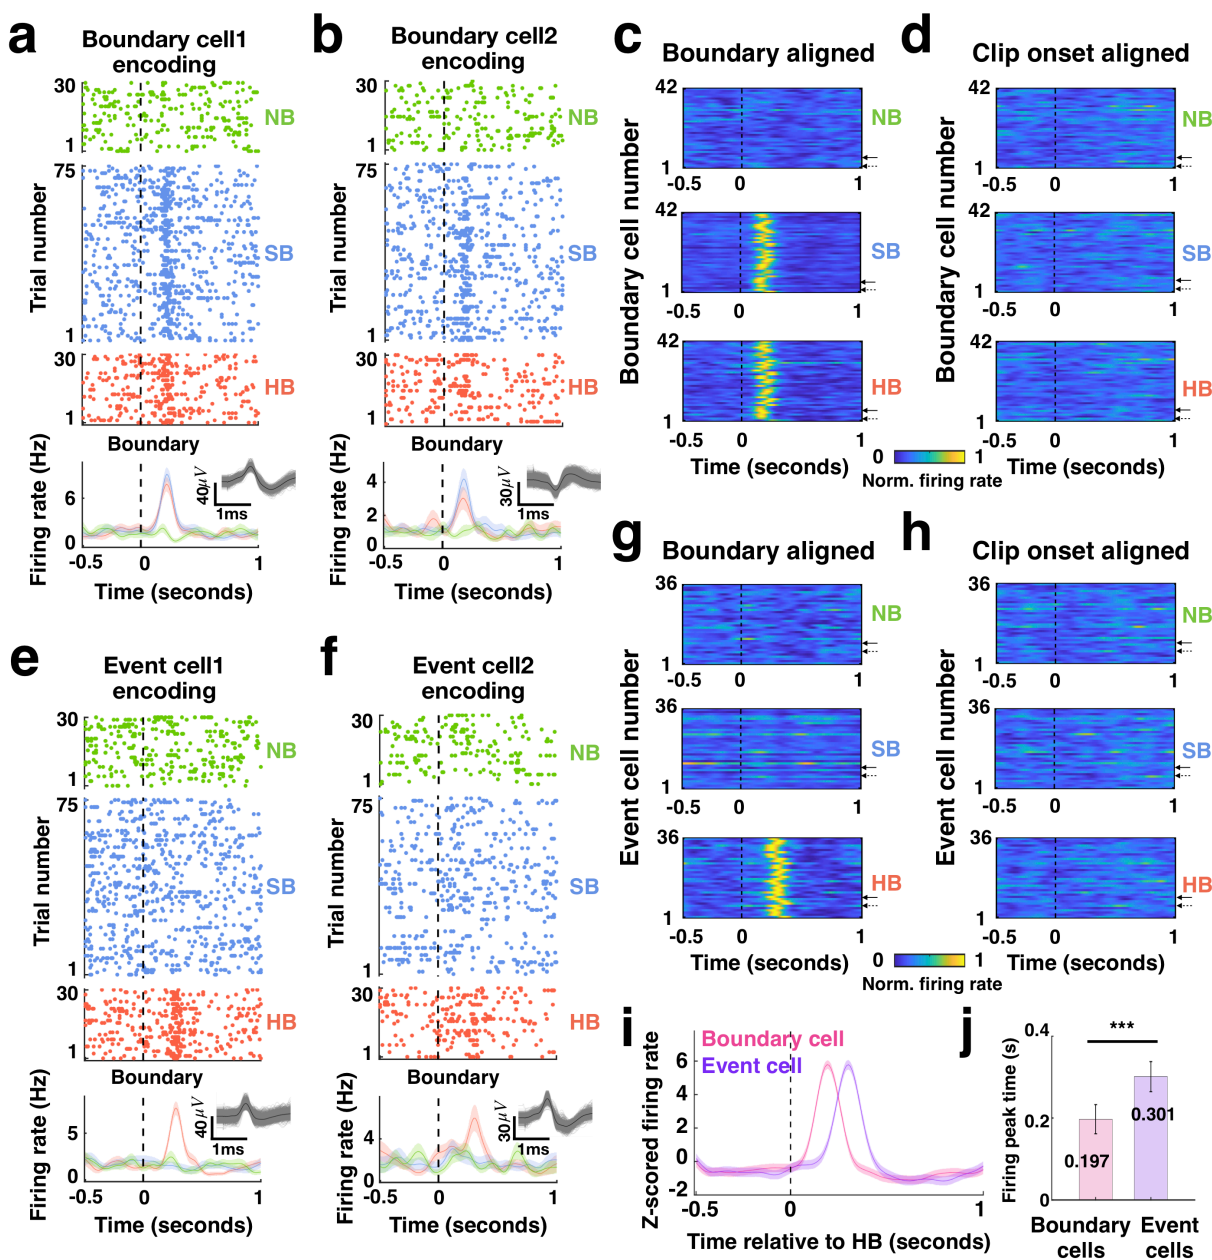

229  
 230 **Fig. 3: Boundary cells and event cells demarcate different types of episodic transitions.**  
 231 **a-b.** Responses during the encoding stage from two example boundary cells located in the  
 232 parahippocampal gyrus and hippocampus, respectively (spike sorting quality of all detected cells  
 233 shown in **Extended Data Fig. 6**). Boundary cells responded to both SB (blue) and HB (red)  
 234 transitions. Responses are aligned to the middle point of the clip (NB, green) or to the boundary  
 235 (SB, HB). Top: raster plots. Bottom: Post-stimulus time histogram (bin size = 200 ms, step size =  
 236 2ms, shaded areas represented  $\pm$  s.e.m. across trials). Insets: all spike extracellular waveforms  
 237 (gray) and mean (black). **c-d.** Firing rates of all 42 boundary cells (solid and dashed arrows denote  
 238 the examples in **a** and **b**, respectively) during the encoding stage aligned to the clip onsets (**d**) or  
 239 boundaries (**c**), averaged over trials within each boundary type and normalized to each neuron's  
 240 maximum firing rate from the entire task recording (see color scale on bottom). Boundary cells  
 241 responded to boundaries (SB and HB) (**c**) but not to clip onsets (**d**) or clip offsets (**Extended Data**  
 242 **Fig.7a-c**). **e-f.** Responses during the encoding stage from two example event cells located in the  
 243 hippocampus and amygdala, respectively. Event cells responded to HB (red) but not SB (blue)

244 transitions. **g-h**. Firing rates of all 36 event cells (solid and dashed arrows denote the examples  
245 in **e** and **f**, respectively) during the encoding stage, using the same format as **c-d**. Event cells  
246 responded to HB (**g**) but did not respond to clip onsets (**h**) or clip offsets (**Extended Data Fig.7d-  
247 f**). **i**. Latency analysis. Firing rate during HB transitions (to which both boundary cells and event  
248 cells responded) reached peak response earlier for boundary cells (pink) compared to event cells  
249 (purple). Shown is average z-score firing rate normalized using the average and standard  
250 deviation of the firing rates and aligned to HB (bin size = 200 ms, step size = 2ms, shaded areas  
251 represented  $\pm$  s.e.m. across all boundary cells or event cells). **j**. Peak times of average firing rate  
252 traces of all boundary cells (pink) and all event cells (purple). Error bars indicate standard  
253 deviation across  $n = 42$  or  $36$  cells, respectively.  $***P < 0.001$ , one-way ANOVA, degrees of  
254 freedom =  $(1, 76)$ . The spatial distribution of boundary cells and event cells is shown in **Extended  
255 Data Table 4**. See **Extended Data Fig. 8-9** for responses of boundary cells and event cells during  
256 the scene recognition and time discrimination stages.

### 257 **The responses of boundary and event cells predict later memory strength**

258 We next asked whether the responses of boundary and event cells during video watching  
259 (encoding) correlated with later measures of memory for the content of the videos. We examined  
260 whether the strength of responses of boundary cells or event cells to boundaries varied as a  
261 function of whether the familiarity or temporal order of a stimulus was later remembered or  
262 forgotten. Fig. 4a show an example boundary cell located in the hippocampus whose response  
263 during encoding differed between video clips from which frames were later correctly remembered  
264 as familiar (Fig. 4a<sub>1</sub>) vs. incorrectly identified as novel (forgotten, Fig. 4a<sub>2</sub>): the responses to  
265 boundaries that preceded later remembered frames was significantly stronger. This effect was  
266 present, on average, in the group of previously selected boundary cells ( $n = 42$ ) for frames  
267 proceeded by both SBs and HBs, but not by NBs (Fig. 4c; SB:  $F(1, 82) = 82.93, p = 4.41 \times 10^{-14}$ ;  
268 HB:  $F(1, 82) = 156.9, p = 9.81 \times 10^{-21}$ ; NB:  $F(1, 82) = 1.18, p = 0.28$ ). This effect was specific to  
269 scene recognition and boundary cells. First, the firing rate of boundary cells did not significantly  
270 predict performance in the time discrimination task (Extended Data Fig. 10a, c; NB:  $F(1, 82) =$   
271  $1.25, p = 0.27$ ; SB:  $F(1, 82) = 1.35, p = 0.25$ ; HB:  $F(1, 82) = 1.14, p = 0.29$ ). Second, the firing  
272 rate of event cells ( $n = 36$ ) during encoding was not predictive of recognition memory (Extended  
273 Data Fig. 11a, c; NB:  $F(1, 70) = 1.12, p = 0.29$ ; SB:  $F(1, 70) = 1.63, p = 0.21$ ; HB:  $F(1, 70) = 0.79,$   
274  $p = 0.38$ ). Third, the firing rate of event cells did not predict performance in the time discrimination

275 task (Fig. 4e shows an example and Fig. 4g shows the population summary; NB:  $F(1, 70) = 0.35$ ,  
276  $p = 0.56$ ; SB:  $F(1, 70) = 0.22$ ,  $p = 0.64$ ; HB:  $F(1, 70) = 1.6$ ,  $p = 0.21$ ).

277         Given the importance of theta-frequency band spike field coherence in plasticity<sup>22</sup>, we next  
278 considered the timing of spikes with respect to theta oscillations in the local field potential (4-8Hz,  
279 measured on the microwire where the neuron was recorded from, see Methods). We determined  
280 the theta phase of each spike within a 1s window following boundaries and compared the resulting  
281 phase distributions among NB, SB and HB. This analysis revealed that event cells tended to fire  
282 at a given phase of theta following both HB and SB boundaries for clips whose temporal order  
283 was later remembered correctly (Fig. 4f shows an example). To summarize this effect across the  
284 population, we computed the mean resultant length (MRL) of all phases for all spikes fired by a  
285 given cell (see Methods). The mean MRL across all event cells ( $n = 36$ ) was significantly larger  
286 following both SB and HB but not NB if temporal order was later correctly remembered (Fig. 4h;  
287 SB:  $F(1, 70) = 81.55$ ,  $p = 2.32 \times 10^{-13}$ ; HB:  $F(1, 70) = 60.79$ ,  $p = 4.32 \times 10^{-11}$ ; NB:  $F(1, 70) = 1.53$ ,  
288  $p = 0.22$ ). This effect was specific to event cells and temporal order memory. First, the strength  
289 of phase-locking of event cells did not predict recognition memory success (Extended Data Fig.  
290 11b, d; NB:  $F(1, 70) = 0.75$ ,  $p = 0.39$ ; SB:  $F(1, 70) = 1.1$ ,  $p = 0.30$ ; HB:  $F(1, 70) = 2.13$ ,  $p = 0.15$ ).  
291 Second, the strength of phase-locking of boundary cells neither predicted recognition memory  
292 success (Fig. 4b, d; NB:  $F(1, 82) = 1.16$ ,  $p = 0.28$ ; SB:  $F(1, 82) = 1.87$ ,  $p = 0.18$ ; HB:  $F(1, 82) =$   
293  $0.45$ ,  $p = 0.5$ ) nor temporal order memory (Extended Data Fig. 10b, d;  $F(1, 82) = 1.33$ ,  $p = 0.25$ ;  
294 SB:  $F(1, 82) = 0.14$ ,  $p = 0.71$ ; HB:  $F(1, 82) = 1.98$ ,  $p = 0.16$ ).

295         In sum, boundary cells and event cells predict distinct aspects of memory formation:  
296 whereas the firing rate of boundary cells was predictive of later recognition memory performance,  
297 the phase-locking of event cells was predictive of temporal order memory performance.

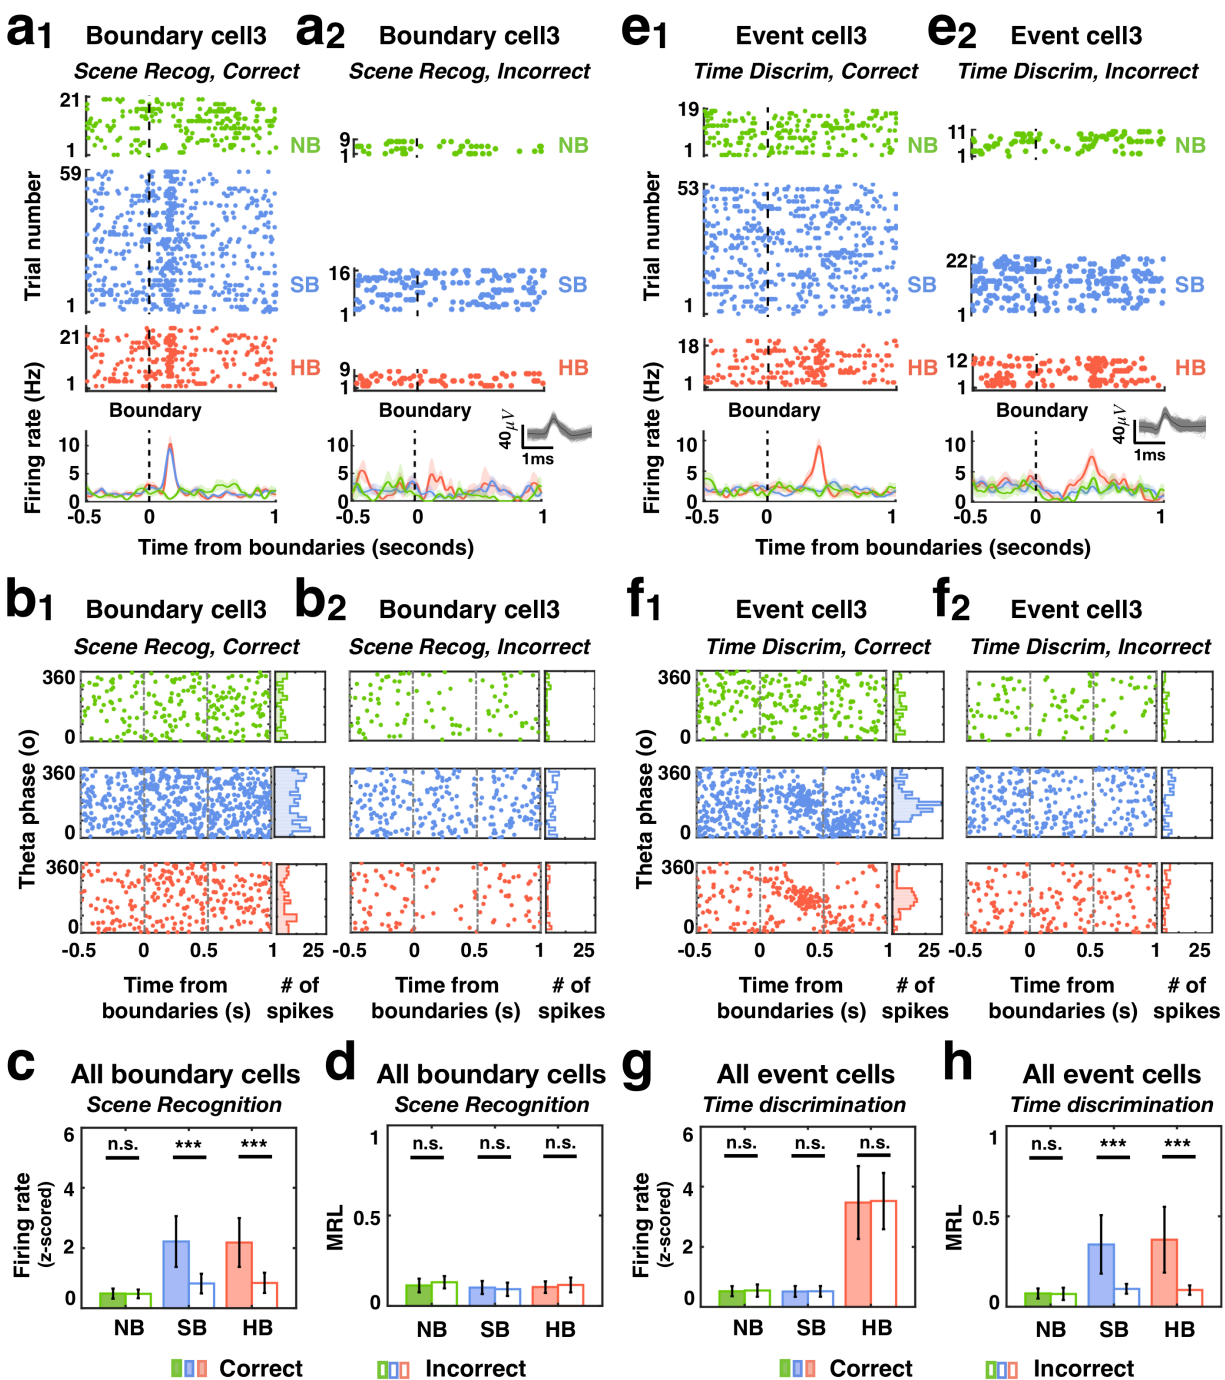

298  
 299  
 300 **Fig. 4: Responses of boundary cells and event cells during encoding correlate with later**  
 301 **retrieval success.** **a-d.** Response of boundary cells during encoding grouped by subjects'  
 302 subsequent memory performance in the scene recognition task. **a<sub>1</sub>-a<sub>2</sub>.** Example boundary cell  
 303 recorded in the hippocampus. During encoding, this cell responded more strongly to SB and HB  
 304 transitions than NB if the frame following the boundary in that trial was correctly identified during  
 305 the scene recognition task (**a<sub>1</sub>**) compared to incorrect trials (**a<sub>2</sub>**). Format as in Fig. 3. **b<sub>1</sub>-b<sub>2</sub>.** Left:  
 306 timing of spikes from the same boundary cell shown in **a** relative to theta phase calculated from  
 307 the local field potentials, for clips of which frames were later remembered (**b<sub>1</sub>**) or forgotten (**b<sub>2</sub>**).  
 308 Right: phase distribution of spike times in the 1s period following the middle of the clip (NB) or  
 boundary (SB, HB) for clips from which frames were remembered (**b<sub>1</sub>**) and forgotten (**b<sub>2</sub>**). **c-d.**

309 Population summary for all 42 boundary cells. **c.** Z-scored firing rate (0-1s after boundaries during  
310 encoding) differed significantly between boundaries after which frames were subsequently  
311 remembered (color filled) vs. forgotten (empty) for both SB and HB. **d.** Mean resultant length  
312 (MRL) of spike times (i.e., sum of vectors with vector lengths equal to 1 and vector angles equal  
313 to the spike timings relative to theta phases 0-1s after boundaries during encoding, divided by  
314 total number of vectors; value range [0 1]: 0 = uniform distribution, i.e., neurons fire at random  
315 theta phases; 1 = unimodal distribution, i.e., neurons fire at the same theta phase) across all  
316 boundary cells for each boundary type did not differ significantly between correct (color filled) and  
317 incorrect (empty) clips. **e-h.** Response of event cells during encoding grouped by subjects'  
318 subsequent memory performance in the time discrimination task. **e<sub>1</sub>-e<sub>2</sub>.** Example event cell  
319 recorded in the hippocampus that responded to HB transition regardless of whether the temporal  
320 order of the clip was later correctly (**e<sub>1</sub>**) or incorrectly (**e<sub>2</sub>**) recalled in the time discrimination  
321 task. Format same as in **a** but clips were grouped based on memory outcomes in the time discrimination  
322 task. **f<sub>1</sub>-f<sub>2</sub>.** The spike timing of the same event cell shown in **e<sub>1</sub>-e<sub>2</sub>** relative to theta phase plotted  
323 for correct (**f<sub>1</sub>**) and incorrect (**f<sub>2</sub>**) trials. Format same as in **b** but clips were grouped based on  
324 memory outcomes in the time discrimination task. **g-h.** Population summary for all 36 event cells.  
325 **g.** Z-scored firing rate (0-1s after boundaries during encoding) did not differ significantly between  
326 later correctly (color filled) or incorrectly (empty) remembered temporal orders for all three  
327 boundary types. **h.** MRL of spike times (relative to theta phases, 0-1s after boundaries during  
328 encoding) was significantly larger after SB and HB transitions if the temporal order of the clip was  
329 correctly recalled (color filled) compared to the incorrect ones (empty). Error bars indicate  
330 standard deviation across  $n = 42$  cells for **c,d** and  $n = 36$  cells for **g,h**.  $***P < 0.001$ , one-way  
331 ANOVA, degrees of freedom = (1, 82) for **c,d** and degrees of freedom = (1, 70) for **g,h**.

### 332 **Neural state shifts across boundaries improve scene recognition but impair time** 333 **discrimination**

334 We next investigated the changes in the neural responses following boundaries at the  
335 population level of all  $n=580$  MTL cells (pseudopopulation, see Methods). We examined the  
336 dynamics of population activity around the boundaries by evaluating the change of activity using  
337 principal component analysis. During NB video clips, the neural state exhibited only slow changes  
338 as a function of time (Fig. 5a, black dot marks the middle of the clip). In contrast, the neural state  
339 changed abruptly during SB and HB video clips following the boundaries (Fig. 5b, c; black dot  
340 marks boundary time). These abrupt 'neural state shifts' were consistent with the changes in firing  
341 rates we reported for boundary and event cells (but note here all recorded cells in the MTL were  
342 analyzed). To quantify the size of state shifts, we computed the multidimensional Euclidean  
343 distance  $MDD(t)$  in state space between a time  $t$  and the boundary (Fig. 5d-g; time of boundary  
344 is defined as  $t = 0$  for convenience). The dimensionality of the state space we used was the



345 number of PCs that together explained  $\geq 99\%$  of the variance. Plotting MDD as a function of time  
346 revealed an abrupt change within  $\sim 300$  ms after the boundary for SB and HB video clips (Fig. 5d-  
347 g).

348 We evaluated what types of cells contributed most to the neural state shift. First, neural  
349 state shifts following SBs were only visible when boundary cells were included (Fig. 5d, e). Second,  
350 early neural state shifts after HBs were only visible when event cells were included while later  
351 HB-related shifts remained present in the absence of either event cells (Fig. 5f) or both event and  
352 boundary cells (Fig. 5g). Third, the point of time at which MDD reached its maximal value varied  
353 systematically between groups of cells: the boundary responses carried by boundary cells  
354 appeared significantly earlier than those carried by boundary cells and non-boundary/event cells  
355 (Fig. 5h;  $F(3, 76) = 103.96$ ,  $p = 8 \times 10^{-27}$ ). Together, this shows that early population-level state  
356 shifts are principally due to the activity of boundary cells, whereas event cells and non-  
357 boundary/event cells in MTL contribute to slower-latency HB-related state shifts.

358 We next assessed whether the size of neural state shifts following boundaries during  
359 encoding were related to whether a stimulus was later remembered or not. We computed the  
360 extent and length of state changes in the population following a boundary by calculating the  
361 cumulative Euclidean distance traversed in state space in the period between the boundary and  
362 the tested frame (cumMDD; see Methods). We found that cumMDD was positively correlated with  
363 recognition accuracy for frames that followed both SB and HB, but not NB (Fig. 5i; Pearson  
364 correlation; SB:  $r = 0.75$ ,  $p = 2 \times 10^{-4}$ ; HB:  $r = 0.54$ ,  $p = 0.015$ ; NB:  $r = 0.33$ ,  $p = 0.07$ ). In contrast,  
365 cumMDD was negatively correlated with accuracy in the time discrimination task for both SB and  
366 HB, but not for NB (Fig. 5j, Pearson correlation, SB:  $r = -0.49$ ,  $p = 0.03$ ; HB:  $r = -0.64$ ,  $p = 0.002$ ;  
367 NB:  $r = 0.097$ ,  $p = 0.61$ ). Together, this result reveals a neural correlate of the tradeoff between  
368 these two types of memory, with large neural state shifts beneficial for recognition memory but  
369 detrimental for order memory. This observation is concordant with the behavioral results, where

370 we found that HB-type boundaries enhanced recognition memory but disrupted order memory  
 371 (Fig. 2).

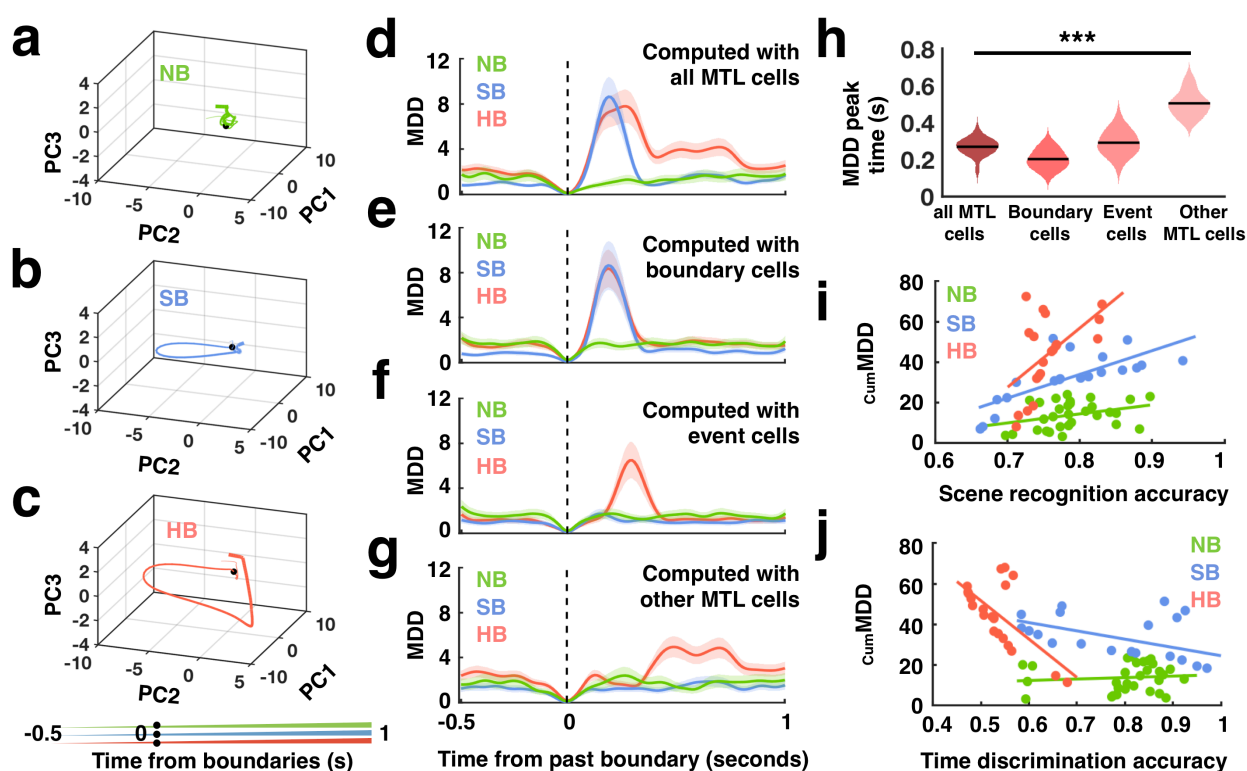

372  
 373  
 374 **Fig. 5: Population neural state shift magnitude following episodic transitions reflects**  
 375 **subjects' subsequent memory performance.** **a-c.** Trajectories in neural state space formed by  
 376 the top three principal components (PCs with most explained variance: PC1 = 26.05%, PC2 =  
 377 10.89%; PC3 = 6.69%) summarizing the activity of all MTL cells during the encoding stage for  
 378 clips containing NB (**a**), SB (**b**) and HB (**c**). Each data point indicates the neural state at a specific  
 379 time relative to boundary onset (line thickness indicates time; see scale on bottom). Black dots  
 380 mark the time of the boundary (SB, HB) or the middle of the clip (NB). **d-g.** Multidimensional  
 381 distance (MDD, i.e., Euclidean distance relative to boundaries in the PC space formed by all PCs  
 382 that cover explained variance  $\geq 99\%$ , see **Extended Data Fig. 12**) as a function of time aligned  
 383 to the middle of the clip (green: NB) and boundaries (blue: SB, red: HB). MDD is shown for all  
 384 MTL cells (**d**,  $n = 528$  in top 55 PCs space), all boundary cells (**e**,  $n = 42$  in top 27 PCs space), all  
 385 event cells (**f**,  $n = 36$  in top 26 PCs space), and all other MTL cells (i.e., non-boundary/event cells  
 386 in the MTL; **g**,  $n = 450$  in top 58 PCs space). Shaded areas represent  $\pm$  s.e.m. across trials. **h.**  
 387 Latency analysis. Time when MDD shown in **d-g** reached peak value following HB (red lines)  
 388 significantly differed when computed with different groups of cells. **i-j.** Correlation between  
 389 distance in state space and behavior. **i.** Positive correlation between cumulative MDD (cumMDD:  
 390 cumulative sum of Euclidean distances between boundary onset and the point of time at which  
 391 the later target frame was shown in the PC space shown in **d**) and scene recognition accuracy.  
 392 Dots mark the accuracy in the scene recognition task (x-axis) and the cumMDD during encoding  
 393 (y-axis) of the target frames plotted separately for frames that follow NB (green:  $r = 0.33$ ,  $p = 0.07$ ),  
 394 SB (blue:  $r = 0.75$ ,  $p = 2 \times 10^{-4}$ ) and HB (red:  $r = 0.54$ ,  $p = 0.015$ ). **j.** Negative Correlation between  
 395 the cumMDD versus time discrimination accuracy plotted in the same format as **i** for NB (green:

396  $r = 0.097$ ,  $p = 0.61$ ), SB (blue:  $r = -0.49$ ,  $p = 0.03$ ) and HB (red:  $r = -0.64$ ,  $p = 0.002$ ).  $***P < 0.001$ ,  
397 one-way ANOVA, degrees of freedom = (3, 76) in **h**.

### 398 **Reinstatement of neural context after boundaries facilitates recognition.**

399 It is thought that reinstatement of the neural context present at encoding enables mental  
400 time travel during memory retrieval<sup>23,24</sup>. However, it remains unknown what exactly is reinstated  
401 for continuous experience and how boundaries shape the retrieval process. To address this  
402 question, for each subject, we quantified the degree of reinstatement by computing the correlation  
403 between the vectors of spike counts of all recorded MTL neurons during recognition (1.5s fixed  
404 time window) and during encoding (1.5s sliding window, step size 0.1s; see Methods). Correct  
405 targets (i.e., frames from presented clips during encoding that were correctly remembered as “old”)  
406 were accompanied by a high correlation between neural activity during the scene recognition and  
407 the encoding period shortly after SB/HB transitions (Fig. 6a, e;  $p < 0.01$ , permutation test, see  
408 Methods). In contrast, we observed no significant correlation for forgotten targets (i.e., frames  
409 from presented clips that were incorrectly marked as “new”; Fig. 6b, f) or correctly identified foils  
410 (i.e., frames from unpresented clips correctly marked as “new”; Fig. 6c, g). Notably, correlations  
411 were strongest at points of time following the boundary that preceded the time at which the later  
412 tested boundary was shown (see Extended Data Fig. 13 for statistics). This observation indicates  
413 that what was reinstated was the neural state present following the boundary rather than the state  
414 present at the time the tested frame was shown.

415 Reinstatement is thought to contribute primarily to recollection of details during retrieval<sup>25</sup>.  
416 Compatible with this view, we found that the correlations following boundary transitions were  
417 significantly stronger in high- compared to low-confidence trials during both correctly remembered  
418 as well as falsely recognized trials (Fig. 6i-l; High confidence, correct target:  $F(2, 54) = 8.61$ ,  $p =$   
419  $6 \times 10^{-4}$ ; High confidence, incorrect foil:  $F(2, 54) = 5.76$ ,  $p = 0.033$ ).

420 Notably, strong correlations also occurred when a new image was incorrectly classified as  
421 seen before (Fig. 6d, h; incorrect foil;  $p < 0.01$ , permutation test, see Methods), thereby revealing

422 a neural explanation for the false alarms. Were these false alarms, which were accompanied by  
423 neural reinstatement, caused by visual similarity between the targets and foils? To address this  
424 question, we assessed the similarity between each target and foil by acquiring similarity ratings  
425 from an independent control group of subjects ( $n = 30$ ). Similarity values were balanced across  
426 NB, SB and HB (As shown in Extended Data Fig. 4a). We split foils into low (top 66.67% - 100%),  
427 medium (top 33.33% - 66.67%) and high (top 1% - 33.33%) similarity groups (see examples in  
428 Fig. 6m). Correlations between encoding and scene recognition were significantly stronger for  
429 highly similar foils falsely recognized as old compared to low and medium similarity foils (Fig. 6o;  
430 incorrect foil:  $F(2, 54) = 10.67, p = 1 \times 10^{-4}$ ). In contrast, the extent of correlation for correctly  
431 rejected foils (true negatives) did not vary as a function of similarity (Fig. 6n, correct foil:  $F(2, 54)$   
432  $= 2.182, p = 0.144$ ). This result indicates that the reason for false alarms was that the wrong  
433 context was reinstated due to the high similarity of the foil with a target. Together, these results  
434 support the notion that the neural state present at encoding following the boundary was reinstated  
435 during memory retrieval.

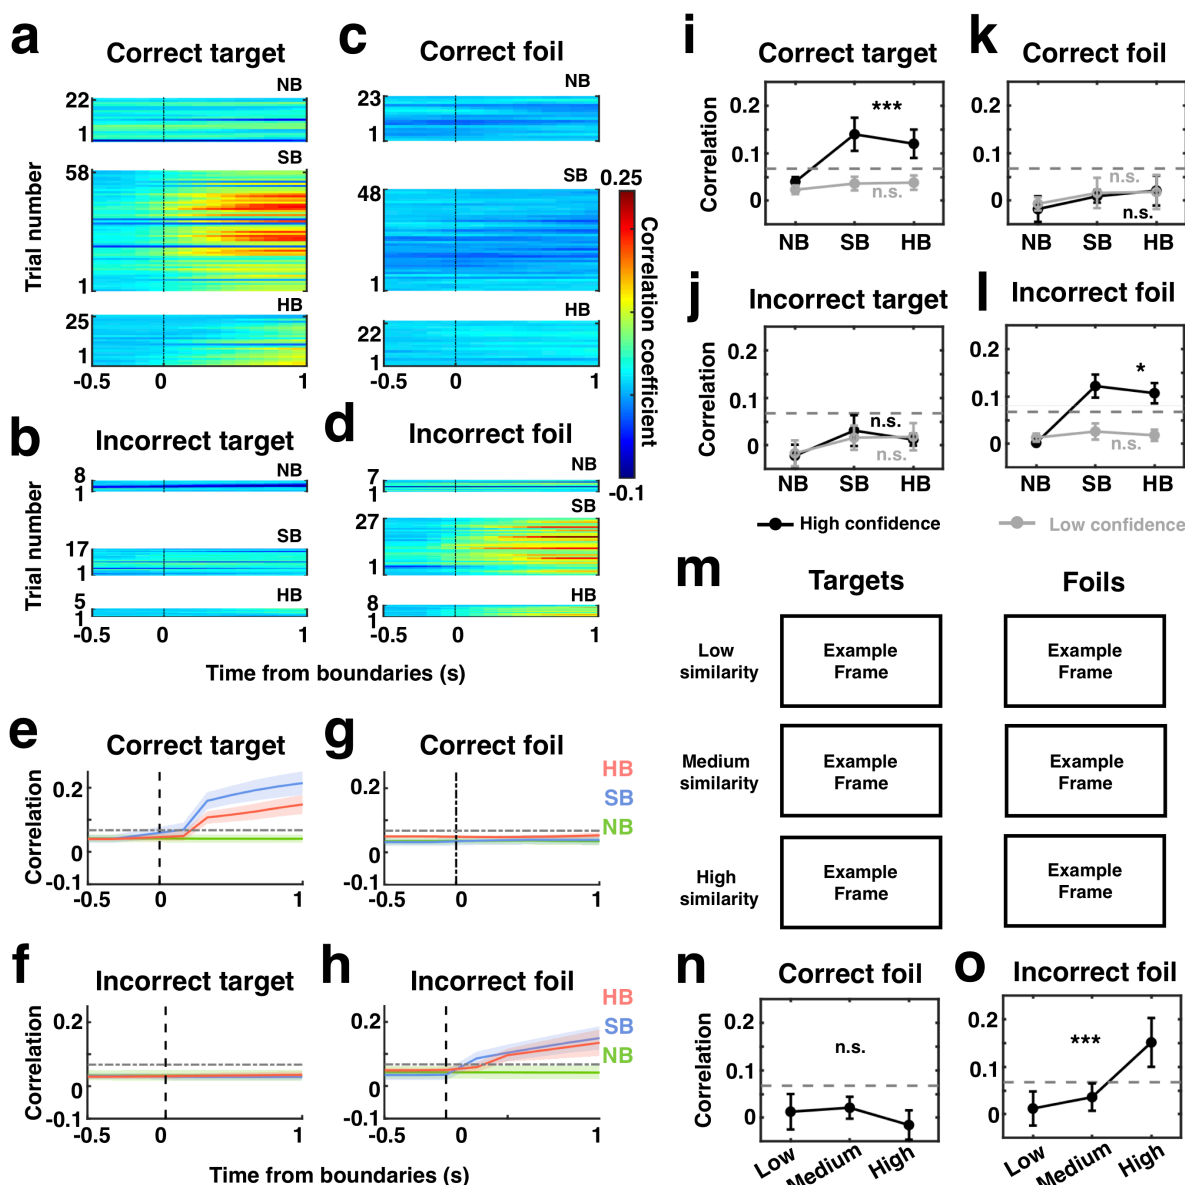

436  
 437 **Fig. 6: Reinstatement of neural context after boundaries during recognition.** a-d. Single-  
 438 subject example. Color code indicates correlation between the population response during scene  
 439 recognition (0-1.5s relative to stimulus onset) and the encoding period (sliding window of 1.5s and  
 440 100ms step size). Correlations are aligned to the middle of the clip (NB) or boundaries (SB, HB)  
 441 and are shown separately for correctly recognized familiar target (a), correctly recognized novel  
 442 (not seen) foils (c), forgotten target (b) and incorrectly recognized foils (false positives, d) in the  
 443 scene recognition task. e-h. Population summary. Correlation coefficient as shown in part a-d,  
 444 averaged across all subjects for NB (green), SB (blue), and HB (red) trials. Shaded areas  
 445 represented  $\pm$  s.e.m. across subjects. The grey dashed horizontal lines denote the significant  
 446 threshold ( $p < 0.01$ , permutation test, see Methods). i-l. Population summary (confidence).  
 447 Reinstatement differed between frames remembered with high (black) and low (gray) confidence  
 448 responses for “old” decisions (correct target and incorrect foil) but not “new” decisions (correct foil  
 449 and incorrect target), regardless of whether they were correct or incorrect. Correlation coefficients  
 450 as shown in part e-h, averaged over 0-1s after boundaries. m. Example target and foil frame pairs  
 451 with low, medium and high similarity (rated by an independent control group,  $n = 30$ , see

452 **Extended Data Fig. 4a**). Note that owing to copyright issues, all original images have been  
453 removed but are available upon reasonable request. **n-o**. Population summary (target-foil  
454 similarity). Correlation coefficients versus similarity ratings between targets and foils, plotted for  
455 correct (**n**) and incorrect recognized foils (**o**). Error bars indicate standard deviation across  $n = 19$   
456 sessions.  $*P < 0.05$ ,  $***P < 0.001$ , one-way ANOVA, degrees of freedom = (2, 54). Correlation  
457 metrics aligned to targets are shown in **Extended Data Fig.13**.  
458

## 459 **Discussion**

460 Memories are often conceptualized as discrete events on a narrative timeline<sup>5</sup>. However,  
461 the very definition of an event is only beginning to be understood. Specifically, where do events  
462 start and end, and how are multiple signals bound together over time to form a singular event?  
463 Here, we tested the hypothesis that boundary detection is a mechanism that segments continuous  
464 experience into discrete events by causing “jumps” in the neural context. Behaviorally, consistent  
465 with previous findings<sup>26</sup>, we found that boundaries enhanced recognition memory while disrupting  
466 temporal order memory. Neuronally, we observed single neurons in the medial temporal lobe  
467 (MTL) that signaled the presence of boundaries with increased firing rates. These cells triggered  
468 a neural state shift at the population level. Aspects of the boundary-related responses predict  
469 specific kinds of later improved (recognition) or impaired (order memory) memory performance,  
470 showing the behavioral relevance of this neural mechanism for shaping our memories. Lastly,  
471 successful recognition relied on the reinstatement of the neural state present shortly after a  
472 detected boundary during retrieval.

473 Both soft-and hard boundaries are accompanied by salient visual changes, whereas the  
474 ‘no boundary’ control condition had no such changes (Fig. 1b). However, the observed responses  
475 to boundaries of boundary cells and event cells (Fig. 3) cannot be explained by these sharp visual  
476 input changes: First, the cells did not respond to the equally strong visual changes at stimulus  
477 onsets and offsets (Extended Data Fig. 7-8). Second, cells differentiated between soft-and hard  
478 boundaries despite these types of boundaries not being distinguishable at the pixel-and higher-  
479 level visual features (we also confirmed this finding psychophysically with additional human  
480 control subjects, Extended Data Table 1).

481           Boundary cells respond to both soft-and hard boundaries, whereas event cells respond  
482 only to hard boundaries (Fig. 3). The distinct responses of these two kinds of cells might reflect  
483 the hierarchical structure of episodic memory, with event cells representing episodic transitions  
484 between completely distinct events while boundary cells represent more frequent but smaller  
485 episodic transitions within the same overall narrative. Our findings provide empirical evidence for  
486 the theory<sup>8</sup> that event segmentation is a hierarchical dynamic procedure, with fine to coarse  
487 segmentations associated with different kinds of cognitive boundaries. The anatomical location  
488 and response latency of our cells was also compatible with this proposal: boundary cells (which  
489 responded first) were most common in the parahippocampal gyrus, whereas event cells (which  
490 responded later) were most common in the hippocampus (Extended Data Table 4). Thus, the  
491 faster more frequently occurring boundary-related responses were encoded in parahippocampal  
492 gyrus, with more abstract and rarer boundary-related responses encoded later in the  
493 hippocampus. This distinction was also visible at the population level, with neural state shifts for  
494 SBs mainly driven by boundary cells, whereas HB-related state shifts occurred later and were  
495 driven by a broader group of cells (Fig. 5d-h). We hypothesize that the early responses of  
496 boundary cells (mostly in the parahippocampal gyrus) reflect contextual changes detected in the  
497 higher-level visual areas<sup>27,28</sup>, while event cells (mostly in the hippocampus) are the result of a late  
498 output signal from a comparator operation<sup>29,30</sup> (between predicted and received signal).

499           The responses of boundary or event cells in our study bring to mind border and place cells  
500 in the rodent hippocampus<sup>14,31</sup>, which respond to physical boundaries or locations in the  
501 environment, respectively. As rodents move between compartments, place cells cluster at  
502 boundaries (e.g., doorways)<sup>12</sup>, crossing of which is followed by remapping<sup>16,17</sup> or reinstatement<sup>13,18</sup>  
503 of a different set of hippocampal place fields. In our study, boundary cells and event cells  
504 responded to transitions (boundaries) between different episodic contexts in the video clips with  
505 an increase in firing rates. Also, similar to place field remapping, neural state in the medial  
506 temporal lobe changed abruptly following crossing of a boundary. Notably, this occurred despite

507 the new context entered being novel (a situation in which place fields would take multiple  
508 exposures to develop). When subjects were re-exposed to familiar target frames during the later  
509 recognition test, reinstatement of neural state occurred (similar to remapping) if the item was  
510 successfully recognized. Similar to place field reinstatement, the reinstated neural state was most  
511 similar to that which occurred at the point of time shortly following the boundary that preceded the  
512 tested memory item rather than the neural state that was present when the tested frame was first  
513 shown. This finding provides insight into the important question of what neural context seen at  
514 what point of time in the past is reinstated during mental time travel and memory search<sup>32-36</sup>. This  
515 finding also indicates that abrupt changes in neural context are important to demarcate periods  
516 of time that can be reinstated later from those that cannot. We note several key differences  
517 between the boundary cells and event cells we reported here, and border cells reported in rodents.  
518 Border cells respond to physical boundaries and rely on specific tasks in specific physical  
519 environments in which rodents are extensively trained. In contrast, boundary or event cells in  
520 humans responded flexibly to abstract cognitive boundaries for a large variety of different contexts  
521 (videos), none of which subjects have seen before and in each of which the boundary is marked  
522 in a different way in a different narrative. This property is an essential requirement for a process  
523 to divide experience into episodes to shape episodic memory, which by definition each occur only  
524 once in novel environments.

525         What roles do the boundary response play in episodic memory formation and retrieval? At  
526 the single-cell level, responses of boundary cells and event cells during encoding were predictive  
527 of different aspects of subjects' subsequent memory performance. Whereas the firing rate of  
528 boundary cells predict recognition memory strength, the phase-locking of event cells to theta  
529 oscillations predicted temporal order memory accuracy. This indicates that the two kinds of cells  
530 played distinct roles, with each strengthening only one kind of memory using a different plasticity  
531 mechanism (firing rate and phase-locking, respectively). At the population level, the strength and  
532 duration of the neural state shift that followed a boundary was positively correlated with the



533 strength of recognition memory and negatively correlated with the strength of temporal order  
534 memory. This opposing effect of neural state shifts provides a neural explanation for a  
535 fundamental trade-off imposed by segmenting memory into discreet episodes: such an approach  
536 to organize memory weakens temporal order memory but enhances memory for items seen  
537 shortly after initiating a new episode<sup>1,6</sup>. Our subjects also exhibited this tradeoff behaviorally.  
538 Together, our results provide direct neural evidence for representations of cognitive boundary  
539 detections and the role of these signals in initiating the formation of and structuring neural  
540 representations of episodic memory.  
541

542 **Methods (3000 words)**

543 **Task.** The task consisted of three parts: encoding, scene recognition, and time discrimination (Fig.  
544 1a).

545 Encoding: subjects watched a series of 90 unique clips with no sound and were instructed to  
546 memorize as much of the clips as possible. Each trial started with a baseline period (i.e., a fixation  
547 cross at the center of a blank screen; the duration of the baseline period ranged from 0.9s to 1.1s  
548 across all the trials). The fixation period was followed by the presentation of a video clip that  
549 contained either no boundaries (NB, continuous movie shots), soft boundaries (SB, cuts to a new  
550 scene within the same movie, 1 to 3 SB per clip, randomly distributed in the clips), or a hard  
551 boundary (HB, cuts to a new scene from a different movie, 1 HB per clip at 4 seconds of the clip)  
552 Examples of SB and HB are shown in Fig. 1b and Extended Data Fig. 1. A yes/no question related  
553 to the content of the clip (e.g., Is anyone in the clip wearing glasses?) appeared randomly after  
554 every 4-8 clips.

555 Scene recognition: After watching all 90 clips, subjects' memory for the content of the videos was  
556 evaluated in a scene recognition test. During scene recognition, frames extracted from encoded  
557 clips (target frames), and frames from new, never shown, clips (foil frames) were presented to the  
558 subjects. Subjects were instructed to identify whether these frames were "old" or "new" (i.e.,  
559 whether they had seen the frame during the encoding session). Two target frames (in total  $n =$   
560 180) were extracted from each clip, one randomly pulled out from the first half of the clip and the  
561 other one from the second half. Then 50% of these extracted target frames from both first/second  
562 half of the clip ( $n = 90$ ) were selected as templates to search for foil frames from a different movie  
563 played by different actors/actresses ( $n = 30$ ), a different movie played by the same  
564 actors/actresses ( $n = 30$ ), or the unrepresented portion from the same movie played by same  
565 actors/actress ( $n = 30$ ) to introduce different levels of similarity between the target frames and foil  
566 frames. The total number of target/foil frames ( $n = 30$  targets and 30 foils for each boundary type)  
567 and the average similarity level of foil frames were counterbalanced across different boundary

568 types ( $F(1, 88) = 2.62, p = 0.11$ ; rated by Amazon Mechanical Turk workers, see Methods,  
569 *Similarity ratings*).

570 Time discrimination: After the scene recognition test, we evaluated subjects' memory about the  
571 temporal structure of the clip with a time discrimination test. In each trial, two frames (half of them  
572 picked at 1s and 7s, and the other half picked at 3s and 5s of the clip) separated by different kinds  
573 of boundaries (NB, SB, or HB) were extracted from the encoded clips and were presented side  
574 by side. Subjects were instructed to indicate which of the two frames (i.e., "left" or "right") appeared  
575 first (earlier in time) in the videos they watched during encoding.

576 Confidence measurement: All binary choices were made together with a subjective confidence  
577 judgment (i.e., sure, less sure, very unsure). Thus, there were always 6 possible responses for  
578 each question.

579

## 580 **Similarity ratings.**

581 Visual properties of SB and HB. Both SB and HB transitions were accompanied by transient visual  
582 changes (cuts to a scene), whereas there were no such visual changes for the control NB  
583 condition. We quantified the visual changes of each boundary type by computing metrics that  
584 relate to pixel level differences: Luminance; Contrast; Complexity; Entropy; Color distribution)  
585 between pre- and post-boundary frames. In addition, to quantify visual differences not directly  
586 captured at the pixel level, we used pre- and post-boundary frames as inputs for AlexNet network  
587 (pretrained on ImageNet dataset)<sup>37</sup>, extracted the activation matrices from the layer 'fc7' for both  
588 images and computed the Euclidean distance between their activation matrices. Moreover, we  
589 collected perceptual ratings (i.e., similarity ratings between pre- and post- boundary frames) from  
590 Amazon Mechanical Turk (MTurk) workers. During similarity ratings, pre- and post-boundary  
591 frames were presented side by side and MTurk workers were instructed to rate the similarity  
592 between them by clicking on a scaling bar ([0 1]; 0 = different, 1 = identical). See results in  
593 Extended Data Table 1.

594 Similarity ratings between target and foil frames: When selecting foil frames, we used target  
595 frames as templates to search for foil frames with different similarity levels (see Methods, *Task*).  
596 We presented the target frame with its corresponding foil frame side by side and instructed MTurk  
597 workers to rate the similarity between them (see results in Extended Data Fig. 4a).

598 Time discrimination without encoding. To ensure the time discrimination task could not be solved  
599 by pure reasoning, we recruited MTurk workers to perform the time discrimination test without  
600 watching clips (see results in Extended Data Fig. 4b).

601

## 602 **Subjects.**

603 Patients: Twenty patients (see patients' demographics in Extended Data Table 3) with drug-  
604 resistant epilepsy volunteered for this study and gave their informed consents. The institutional  
605 review boards of Toronto Western Hospital and Cedars-Sinai Medical Center approved all  
606 protocols. The task was conducted while the patients stayed in the hospital after implantation of  
607 depth electrodes for monitoring seizures. The location of the implanted electrodes was solely  
608 determined by clinical needs. The behavioral analyses included results from all 20 subjects and  
609 the neural results were analyzed across 19 subjects (Subject #20 had no usable recordings, see  
610 patient information in Extended Data Table 3).

611 Amazon Mechanical Turk Workers (MTurk workers): MTurk workers were recruited for similarity  
612 ratings (see Methods, *Similarity ratings*), including 30 subjects (age  $23.25 \pm 3.42$ , 9 female) for  
613 rating the visual properties of different boundaries (Extended Data Table. 1), 30 subjects (age  
614  $22.79 \pm 5.73$ , 11 female) for rating the similarity between target and foil frames (Extended Data  
615 Fig. 4a), and 30 subjects (age  $25.06 \pm 6.11$ , 7 female) for performing the time discrimination task  
616 without encoding session (Extended Data Fig. 4b). All control tasks conducted on Amazon  
617 Mechanical Turk were under the approval of the institutional review board of Boston Children's  
618 Hospital and informed consents were obtained with digital signatures for each subject.

619

620 **Electrophysiology.** We recorded bilaterally from the amygdala, hippocampus, and  
621 parahippocampal gyrus, as well as other regions outside the medial temporal lobe using hybrid  
622 depth electrodes (Ad-Tech company, Oak Creek, Wisconsin, USA), which contained eight 40- $\mu$ m  
623 diameter microwires at the tip of each electrode shank. For each microwire, broadband signals  
624 (0.1-9000 Hz filtered) were recorded at 32 kHz using the ATLAS system (Neuralynx Inc.,  
625 Bozeman, Montana, USA).

626

627 **Spike sorting and quality metrics of single units.** The recorded signals were filtered offline in  
628 the 300 to 3000 Hz band, with a zero-phase lag filter. Spikes were detected and sorted using the  
629 semiautomated template-matching algorithm Osort<sup>38,39</sup>. We computed spike sorting quality  
630 metrics for all putative single units (see Extended Data Fig. 6) to quantify our recording and sorting  
631 quality<sup>40-42</sup>.

632

633 **Electrode localization.** Electrode localization was based on postoperative MRI/CT scans. We  
634 co-registered postoperative and preoperative MRIs using Freesurfer's mri\_robust\_register<sup>43</sup>. To  
635 summarize electrode positions and to provide across-study comparability, we aligned each  
636 subject's preoperative scan to the CIT168 template brain in MNI152 coordinates<sup>44</sup> using a  
637 concatenation of an affine transformation followed by a symmetric image normalization (SyN)  
638 diffeomorphic transform<sup>45</sup>. The MNI coordinates of the 8 microwires from the same electrode  
639 shank were marked as one location. MNI coordinates of microwires with putative neurons  
640 detected across all the subjects were plotted on a template brain for illustration (Fig. 1e).

641

642 **Data analyses.**

643 Boundary cell: For each recorded neuron, we counted spikes within the [0 1] seconds (post  
644 boundary) and [-1 0] seconds time interval (baseline) relative to boundaries during encoding. A

645 cell was considered a boundary cell if it met the following criteria: 1) its spike counts within post  
646 boundary time windows were significantly different from its spike count within baseline time  
647 windows for SB and HB but not for NB ( $p < 0.05$ , permutation t-test); 2) its spike counts within  
648 post boundary time windows were significantly greater in SB and HB than NB ( $p < 0.05$ ,  
649 permutation t-test).

650 Event cell: A cell was considered as an event cell if it met the following criteria: 1) its spike counts  
651 within post boundary time windows were significantly different from its spike count within baseline  
652 time windows for HB but not for NB and SB ( $p < 0.05$ , permutation t-test); 2) its spike counts within  
653 post boundary time windows were significantly greater in HB than NB and SB ( $p < 0.05$ ,  
654 permutation t-test).

655 Boundary and event cells' responses to stimulus onsets and offsets: For each selected boundary  
656 cell and event cells, we counted spikes within the [0 1]s (post) and [-1 0]s (pre) time interval  
657 relative to stimulus onsets/offsets during encoding. The boundary cell or event cell was  
658 considered as not responding to stimulus onsets/offsets if their spike counts did not differ between  
659 post and pre window in all three boundary conditions ( $p > 0.05$ , permutation t-test).

660

661 **Chance level for cell response analyses.** To estimate the number of neurons that would be  
662 considered boundary cells or event cells by chance, we repeated the same procedures for  
663 boundary cell and event cell analyses after randomly shuffling the trial labels (NB, SB, HB) 1000  
664 times. For each iteration, we obtained the proportion of selected boundary cells and event cells  
665 relative to the total number of neurons within each region. These 1000 values formed the  
666 empirically estimated null distribution for the proportion of boundary cells and event cells expected  
667 by chance. A region was considered to have a significant amount of boundary cells or event cells  
668 if its actual fraction of significant cells exceeded 95% of the null distribution (Extended Data Table  
669 4;  $p < 0.05$ ).

670

671 **Association between spiking activity during encoding and later memory retrieval accuracy.**

672 Firing rate modulation: For each boundary cell and event cell, we grouped its spike activity within  
673 [0 1] seconds after boundaries during encoding based on subjects' subsequent memory  
674 performance either in the scene recognition task (correct versus incorrect recognition) or the time  
675 discrimination task (correct versus incorrect discrimination). We then computed the firing rate as  
676 a function of time (bin size = 200ms, step size = 2ms) for each trial, which was further z-score  
677 normalized using the mean and standard deviation of the firing rate across the whole trial. For  
678 each boundary cell and event cell, we then computed the mean z-scored firing rate within [0 1]  
679 seconds time interval relative to boundaries for each trial and averaged this value across trials  
680 within each boundary type. The resulting values across all boundary cells and event cells were  
681 used for comparisons across NB, SB and HB trials (Figure. 4c, g and Extended Data Fig. 10c and  
682 11c).

683 Phase modulation: For each spike of each boundary cell and event cell, we computed the phase  
684 of the spike relative to the theta-frequency band filtered local field potential signals (LFP) recorded  
685 from the same microwire. The original LFP signals were first band-passed between 1-300Hz and  
686 downsampled from 32Khz to 500Hz. We performed automatic artifact rejections<sup>46</sup> accompanied  
687 with manual visual inspections (ft\_databrowser.m from Fieldtrip toolbox<sup>47</sup>) to remove large  
688 transient signal changes (e.g., spike-artifacts and interictal discharges) from the downsampled  
689 LFPs. Next, we extracted theta-band oscillatory activity (4-8Hz) from the artifact-rejected signals  
690 using the BOSC method<sup>48</sup>, which detects periods of transient oscillatory activity (disregarding  
691 periods of time with non-sinusoidal signals). For each detected bout of theta, we then applied a  
692 Hilbert transform to obtain theta phase as a function of time and extracted the phase for each  
693 spike fired by boundary and event cells. The phase locking strength of each boundary or event  
694 cell was quantified as the mean resultant length (MRL) of all spike phases of all spikes fired within  
695 [0 1] seconds after boundaries (0 = no phase locking; 1 = strongest phase locking) with theta  
696 bouts detected. The resulting MRL values were then compared across NB, SB and HB trials

697 between conditions (Figure. 4d, h and Extended Data Fig. 10d and 11d). The computation of MRL  
698 is sensitive to sample number. Therefore, the comparison of MRL between correct and incorrect  
699 trials was conducted with balanced spike counts.

700

#### 701 **State-space analyses.**

702 Neural state trajectories. For each trial, we binned each neuron's spike counts during encoding  
703 into non-overlapping 10-ms wide bins, followed by smoothing with a 200ms standard deviation  
704 Gaussian kernel and z-score normalization (mean and standard deviation were calculated across  
705 the entire trial). We used these z-scored smoothed spike density estimates from all recorded MTL  
706 cells across all subjects to form a pseudopopulation. We applied principal component analysis  
707 (PCA) to reduce the dimensionality of the pseudopopulation (MATLAB function `svd.m`). We then  
708 rank-ordered the resulting principal components (PCs) by their explained variance (function  
709 `dpca_explainedVariance.m` from `dpca` toolbox<sup>49</sup>) and plotted the average neural state trajectories  
710 for each boundary type in a three-dimensional space constructed by the top three PC components  
711 (Fig. 5a-c).

712 Multidimensional distance (MDD): MDD was defined as the Euclidean distance between two  
713 points in the PC space (with PCs accounted for > 99% explained variance; see Extended Data  
714 Fig. 12).

715 Cumulative Multidimensional distance (cumMDD): cumMDD was defined as the cumulative sum  
716 of all Euclidean distance values between two points of time (in the PC space).

717

718 **Reinstatement of neural context.** This analysis was done separately for each session of  
719 simultaneously recorded neurons and did not rely on the pseudopopulations defined in the  
720 previous section.

721 Correlation between encoding and retrieval: Neural activity was quantified for each neuron in bins  
722 of 1.5s width and a step size of 100ms. We computed the Pearson correlation coefficients



723 (corrcoef.m from MATLAB) between the neural population activity during scene recognition (1  
724 time bin x number of neurons) and encoding (80 time bins x number of neurons) at each time  
725 step.

726 Significant correlation threshold: We computed the same correlation values after randomly  
727 shuffling the trial labels (i.e., after disrupting the correspondence between encoding and scene  
728 recognition trials) to obtain the average correlation strength across trials and neurons expected  
729 by chance. This procedure was repeated 1000 times to form a null distribution, in which the 2.5<sup>th</sup>  
730 and 97.5<sup>th</sup> percentile values were used as the threshold to determine significance of the actual  
731 correlation values (dashed horizontal lines in Fig. 6).

732 Comparison between boundary-aligned and target/foil aligned correlation: We computed the  
733 average correlation coefficients within [-1 0] and [0 1] seconds relative to boundary or relative to  
734 the time when target frames present in the original clip. We then defined boundary-aligned/target  
735 aligned correlations by subtracting the average correlation coefficients in [-1 0] from [0 1] seconds  
736 relative to boundary/target, respectively. Notably, for foil frames, we used the time when their  
737 corresponding target frames (see Methods, *Task*) appeared in the original clip for alignment.

738  
739 **Statistics.** For comparisons between two groups, we used the permuted t-test statistic, and for  
740 comparisons between more than two groups, we used parametric F-statistics. For statistical  
741 thresholding, permutation tests were conducted to generate a null distribution estimated from  
742 1000 runs on data with scrambled labels, which avoids the assumption of normality when  
743 evaluating significance.

744

## 745 References

- 746 1 Ezzyat, Y. & Davachi, L. What constitutes an episode in episodic memory? *Psychol Sci*  
747 **22**, 243-252, doi:10.1177/0956797610393742 (2011).
- 748 2 Tulving, E. Episodic memory: from mind to brain. *Annu Rev Psychol* **53**, 1-25,  
749 doi:10.1146/annurev.psych.53.100901.135114 (2002).
- 750 3 Desimone, R. & Duncan, J. Neural mechanisms of selective visual attention. *Annu Rev*  
751 *Neurosci* **18**, 193-222, doi:10.1146/annurev.ne.18.030195.001205 (1995).
- 752 4 Zacks, J. M., Speer, N. K. & Reynolds, J. R. Segmentation in reading and film  
753 comprehension. *J Exp Psychol Gen* **138**, 307-327, doi:10.1037/a0015305 (2009).
- 754 5 Avraami, J. & Kareev, Y. The emergence of events. *Cognition* **53**, 239-261,  
755 doi:10.1016/0010-0277(94)90050-7 (1994).
- 756 6 DuBrow, S. & Davachi, L. The influence of context boundaries on memory for the  
757 sequential order of events. *J Exp Psychol Gen* **142**, 1277-1286, doi:10.1037/a0034024  
758 (2013).
- 759 7 Chen, J. *et al.* Shared memories reveal shared structure in neural activity across  
760 individuals. *Nat Neurosci* **20**, 115-125, doi:10.1038/nn.4450 (2017).
- 761 8 Kurby, C. A. & Zacks, J. M. Segmentation in the perception and memory of events. *Trends*  
762 *Cogn Sci* **12**, 72-79, doi:10.1016/j.tics.2007.11.004 (2008).
- 763 9 Zacks, J. M., Speer, N. K., Swallow, K. M., Braver, T. S. & Reynolds, J. R. Event  
764 perception: a mind-brain perspective. *Psychol Bull* **133**, 273-293, doi:10.1037/0033-  
765 2909.133.2.273 (2007).
- 766 10 Ben-Yakov, A. & Henson, R. N. The Hippocampal Film Editor: Sensitivity and Specificity  
767 to Event Boundaries in Continuous Experience. *J Neurosci* **38**, 10057-10068,  
768 doi:10.1523/JNEUROSCI.0524-18.2018 (2018).
- 769 11 Zacks, J. M. *et al.* Human brain activity time-locked to perceptual event boundaries. *Nat*  
770 *Neurosci* **4**, 651-655, doi:10.1038/88486 (2001).
- 771 12 Spiers, H. J., Hayman, R. M., Jovalekic, A., Marozzi, E. & Jeffery, K. J. Place field  
772 repetition and purely local remapping in a multicompartiment environment. *Cereb Cortex*  
773 **25**, 10-25, doi:10.1093/cercor/bht198 (2015).
- 774 13 Derdikman, D. *et al.* Fragmentation of grid cell maps in a multicompartiment environment.  
775 *Nat Neurosci* **12**, 1325-1332, doi:10.1038/nn.2396 (2009).
- 776 14 Lever, C., Burton, S., Jeewajee, A., O'Keefe, J. & Burgess, N. Boundary vector cells in the  
777 subiculum of the hippocampal formation. *J Neurosci* **29**, 9771-9777,  
778 doi:10.1523/JNEUROSCI.1319-09.2009 (2009).
- 779 15 O'Keefe, J. & Burgess, N. Geometric determinants of the place fields of hippocampal  
780 neurons. *Nature* **381**, 425-428, doi:10.1038/381425a0 (1996).
- 781 16 Alme, C. B. *et al.* Place cells in the hippocampus: eleven maps for eleven rooms. *Proc*  
782 *Natl Acad Sci U S A* **111**, 18428-18435, doi:10.1073/pnas.1421056111 (2014).
- 783 17 Colgin, L. L., Moser, E. I. & Moser, M. B. Understanding memory through hippocampal  
784 remapping. *Trends Neurosci* **31**, 469-477, doi:10.1016/j.tins.2008.06.008 (2008).
- 785 18 Grieves, R. M., Jenkins, B. W., Harland, B. C., Wood, E. R. & Dudchenko, P. A. Place  
786 field repetition and spatial learning in a multicompartiment environment. *Hippocampus* **26**,  
787 118-134, doi:10.1002/hipo.22496 (2016).
- 788 19 Sun, C., Yang, W., Martin, J. & Tonegawa, S. Hippocampal neurons represent events as  
789 transferable units of experience. *Nat Neurosci* **23**, 651-663, doi:10.1038/s41593-020-  
790 0614-x (2020).
- 791 20 Levine, B. *et al.* Episodic memory and the self in a case of isolated retrograde amnesia.  
792 *Brain* **121 (Pt 10)**, 1951-1973, doi:10.1093/brain/121.10.1951 (1998).
- 793 21 Rutishauser, U. Testing Models of Human Declarative Memory at the Single-Neuron  
794 Level. *Trends Cogn Sci* **23**, 510-524, doi:10.1016/j.tics.2019.03.006 (2019).

- 795 22 Rutishauser, U., Ross, I. B., Mamelak, A. N. & Schuman, E. M. Human memory strength  
796 is predicted by theta-frequency phase-locking of single neurons. *Nature* **464**, 903-907,  
797 doi:10.1038/nature08860 (2010).
- 798 23 Pacheco Estefan, D. *et al.* Coordinated representational reinstatement in the human  
799 hippocampus and lateral temporal cortex during episodic memory retrieval. *Nat Commun*  
800 **10**, 2255, doi:10.1038/s41467-019-09569-0 (2019).
- 801 24 Manning, J. R., Polyn, S. M., Baltuch, G. H., Litt, B. & Kahana, M. J. Oscillatory patterns  
802 in temporal lobe reveal context reinstatement during memory search. *Proc Natl Acad Sci*  
803 *U S A* **108**, 12893-12897, doi:10.1073/pnas.1015174108 (2011).
- 804 25 Folkerts, S., Rutishauser, U. & Howard, M. W. Human Episodic Memory Retrieval Is  
805 Accompanied by a Neural Contiguity Effect. *J Neurosci* **38**, 4200-4211,  
806 doi:10.1523/JNEUROSCI.2312-17.2018 (2018).
- 807 26 Swallow, K. M., Zacks, J. M. & Abrams, R. A. Event boundaries in perception affect  
808 memory encoding and updating. *J Exp Psychol Gen* **138**, 236-257, doi:10.1037/a0015631  
809 (2009).
- 810 27 Isik, L., Singer, J., Madsen, J. R., Kanwisher, N. & Kreiman, G. What is changing when:  
811 Decoding visual information in movies from human intracranial recordings. *Neuroimage*  
812 **180**, 147-159, doi:10.1016/j.neuroimage.2017.08.027 (2018).
- 813 28 Aminoff, E. M., Kveraga, K. & Bar, M. The role of the parahippocampal cortex in cognition.  
814 *Trends Cogn Sci* **17**, 379-390, doi:10.1016/j.tics.2013.06.009 (2013).
- 815 29 Lisman, J. E. & Grace, A. A. The hippocampal-VTA loop: controlling the entry of  
816 information into long-term memory. *Neuron* **46**, 703-713,  
817 doi:10.1016/j.neuron.2005.05.002 (2005).
- 818 30 Vinogradova, O. S. Hippocampus as comparator: role of the two input and two output  
819 systems of the hippocampus in selection and registration of information. *Hippocampus* **11**,  
820 578-598, doi:10.1002/hipo.1073 (2001).
- 821 31 Solstad, T., Boccara, C. N., Kropff, E., Moser, M. B. & Moser, E. I. Representation of  
822 geometric borders in the entorhinal cortex. *Science* **322**, 1865-1868,  
823 doi:10.1126/science.1166466 (2008).
- 824 32 Xiao, X. *et al.* Transformed Neural Pattern Reinstatement during Episodic Memory  
825 Retrieval. *J Neurosci* **37**, 2986-2998, doi:10.1523/JNEUROSCI.2324-16.2017 (2017).
- 826 33 Favila, S. E., Samide, R., Sweigart, S. C. & Kuhl, B. A. Parietal Representations of  
827 Stimulus Features Are Amplified during Memory Retrieval and Flexibly Aligned with Top-  
828 Down Goals. *J Neurosci* **38**, 7809-7821, doi:10.1523/JNEUROSCI.0564-18.2018 (2018).
- 829 34 Jang, A. I., Wittig, J. H., Jr., Inati, S. K. & Zaghloul, K. A. Human Cortical Neurons in the  
830 Anterior Temporal Lobe Reinstatement Spiking Activity during Verbal Memory Retrieval. *Curr*  
831 *Biol* **27**, 1700-1705 e1705, doi:10.1016/j.cub.2017.05.014 (2017).
- 832 35 Howard, M. W. & Natu, V. S. Place from time: Reconstructing position from a distributed  
833 representation of temporal context. *Neural Netw* **18**, 1150-1162,  
834 doi:10.1016/j.neunet.2005.08.002 (2005).
- 835 36 Polyn, S. M. & Kahana, M. J. Memory search and the neural representation of context.  
836 *Trends Cogn Sci* **12**, 24-30, doi:10.1016/j.tics.2007.10.010 (2008).
- 837 37 Krizhevsky, A., Sutskever, I. & Hinton, G.E. Imagenet classification with deep  
838 convolutional neural networks. *Advances in neural information processing systems*, 1097-  
839 1105 (2012).
- 840 38 Rutishauser, U., Schuman, E. M. & Mamelak, A. N. Online detection and sorting of  
841 extracellularly recorded action potentials in human medial temporal lobe recordings, in  
842 vivo. *J Neurosci Methods* **154**, 204-224, doi:10.1016/j.jneumeth.2005.12.033 (2006).
- 843 39 Fried, I., Rutishauser, U., Cerf, M. & Kreiman, G. *Single neuron studies of the human brain*  
844 *: probing cognition.* (The MIT Press, 2014).

- 845 40 Kaminski, J. *et al.* Persistently active neurons in human medial frontal and medial temporal  
846 lobe support working memory. *Nat Neurosci* **20**, 590-601, doi:10.1038/nn.4509 (2017).
- 847 41 Pouzat, C., Mazor, O. & Laurent, G. Using noise signature to optimize spike-sorting and  
848 to assess neuronal classification quality. *J Neurosci Methods* **122**, 43-57,  
849 doi:10.1016/s0165-0270(02)00276-5 (2002).
- 850 42 Harris, K. D., Henze, D. A., Csicsvari, J., Hirase, H. & Buzsaki, G. Accuracy of tetrode  
851 spike separation as determined by simultaneous intracellular and extracellular  
852 measurements. *J Neurophysiol* **84**, 401-414, doi:10.1152/jn.2000.84.1.401 (2000).
- 853 43 Reuter, M., Rosas, H. D. & Fischl, B. Highly accurate inverse consistent registration: a  
854 robust approach. *Neuroimage* **53**, 1181-1196, doi:10.1016/j.neuroimage.2010.07.020  
855 (2010).
- 856 44 Pauli, W. M., Nili, A. N. & Tyszka, J. M. A high-resolution probabilistic in vivo atlas of  
857 human subcortical brain nuclei. *Sci Data* **5**, 180063, doi:10.1038/sdata.2018.63 (2018).
- 858 45 Avants, B. *et al.* Multivariate analysis of structural and diffusion imaging in traumatic brain  
859 injury. *Acad Radiol* **15**, 1360-1375, doi:10.1016/j.acra.2008.07.007 (2008).
- 860 46 Banaie Boroujeni, K., Tiesinga, P. & Womelsdorf, T. Adaptive spike-artifact removal from  
861 local field potentials uncovers prominent beta and gamma band neuronal synchronization.  
862 *J Neurosci Methods* **330**, 108485, doi:10.1016/j.jneumeth.2019.108485 (2020).
- 863 47 Oostenveld, R., Fries, P., Maris, E. & Schoffelen, J. M. FieldTrip: Open source software  
864 for advanced analysis of MEG, EEG, and invasive electrophysiological data. *Comput Intell*  
865 *Neurosci* **2011**, 156869, doi:10.1155/2011/156869 (2011).
- 866 48 Hughes, A. M., Whitten, T. A., Caplan, J. B. & Dickson, C. T. BOSC: a better oscillation  
867 detection method, extracts both sustained and transient rhythms from rat hippocampal  
868 recordings. *Hippocampus* **22**, 1417-1428, doi:10.1002/hipo.20979 (2012).
- 869 49 Kobak, D. *et al.* Demixed principal component analysis of neural population data. *Elife* **5**,  
870 doi:10.7554/eLife.10989 (2016).
- 871 50 Bex, P. J. & Makous, W. Spatial frequency, phase, and the contrast of natural images. *J*  
872 *Opt Soc Am A Opt Image Sci Vis* **19**, 1096-1106, doi:10.1364/josaa.19.001096 (2002).
- 873 51 Donderi, D. C. Visual complexity: a review. *Psychol Bull* **132**, 73-97, doi:10.1037/0033-  
874 2909.132.1.73 (2006).
- 875 52 Tkalcic, M., Tasic, J.F. Colour spaces: Perceptual, historical and applicational  
876 background. *In Proceedings of EUROCON 2003: Computer as a Tool* **1**, 304-308 (2003).
- 877 53 Gelbard-Sagiv, H., Mudrik, L., Hill, M. R., Koch, C. & Fried, I. Human single neuron activity  
878 precedes emergence of conscious perception. *Nat Commun* **9**, 2057,  
879 doi:10.1038/s41467-018-03749-0 (2018).

880

881

882 **Data and Code availability**

883 Data and analytic code that support the findings of this study will be deposited at Open Science

884 Framework upon acceptance.

885

886 **Acknowledgements**

887 We thank Mengmi Zhang, Jan Kaminski and other members from Rutishauser and Kreiman lab

888 for discussion; Nand Chandravadia and Victoria Barkely for data transferring and organization;

889 Chrystal Reed, Jeffrey Chung, and the clinical teams at both Cedars-Sinai Medical Center and

890 Toronto Western Hospital. We especially indebted to the patient volunteers who participated in

891 this study. This work was supported by the Brain Canada program (to A.GPS.) and NIH

892 U01NS103792 (to U.R.).

893

894 **Author contributions**

895 J.Z. conceived the project. J.Z., G.K. and U.R. contributed ideas for experiments and analysis.

896 V.T. and A.M. managed patients and surgeries; J.Z., A.GPS., M. Y. and C. M. collected data; J.Z.

897 performed the analyses; J.Z., G.K. and U.R. wrote the manuscript with input from all authors.

898

899 **Competing interests**

900 Authors declare no competing interests.

901

902 **Materials & Correspondence**

903 Correspondence and requests for materials should be addressed to U.R.

904 (ueli.rutishauser@cshs.org) and G. K. (gabriel.kreiman@childrens.harvard.edu)

905

906

| Visual attributes              | $B_{\text{post}} - B_{\text{pre}}$ |                  |                  | Boundary Type main effect | Post-hoc test |             |            |
|--------------------------------|------------------------------------|------------------|------------------|---------------------------|---------------|-------------|------------|
|                                | NB                                 | SB               | HB               |                           | NB vs SB      | NB vs HB    | SB vs HB   |
| Luminance difference           | 4.47 ± 0.23                        | 4.95 ± 0.53      | 5.18 ± 0.78      | $P < 0.001$               | $P < 0.01$    | $P < 0.001$ | $P = 0.27$ |
| Contrast difference            | 1.25 ± 0.19                        | 1.93 ± 0.50      | 1.77 ± 0.27      | $P < 0.001$               | $P < 0.001$   | $P < 0.001$ | $P = 0.18$ |
| Complexity difference          | 498.38 ± 1.04                      | 1971.38 ± 130.03 | 2031.09 ± 236.23 | $P < 0.001$               | $P < 0.001$   | $P < 0.001$ | $P = 0.30$ |
| Entropy difference             | 0.19 ± 0.01                        | 0.43 ± 0.06      | 0.46 ± 0.08      | $P < 0.001$               | $P < 0.01$    | $P < 0.001$ | $P = 0.12$ |
| LABL difference                | 0.33 ± 0.03                        | 0.69 ± 0.05      | 0.68 ± 0.16      | $P < 0.001$               | $P < 0.001$   | $P < 0.001$ | $P = 0.42$ |
| LABA difference                | 0.08 ± 0.01                        | 0.14 ± 0.08      | 0.14 ± 0.06      | $P < 0.001$               | $P < 0.001$   | $P < 0.001$ | $P = 0.53$ |
| LABB difference                | 0.16 ± 0.08                        | 0.34 ± 0.22      | 0.36 ± 0.24      | $P < 0.001$               | $P < 0.01$    | $P < 0.001$ | $P = 0.19$ |
| Alexnet fc7 Euclidean distance | 22.18 ± 1.98                       | 217.24 ± 27.80   | 199.77 ± 53.85   | $P < 0.001$               | $P < 0.001$   | $P < 0.001$ | $P = 0.14$ |
| Similarity                     | 1.00 ± 0.00                        | 0.67 ± 0.13      | 0.63 ± 0.15      | $P < 0.001$               | $P < 0.001$   | $P < 0.001$ | $P = 0.37$ |

907  
908  
909  
910  
911  
912  
913  
914  
915  
916  
917  
918  
919  
920  
921  
922  
923  
924  
925  
926  
927

**Extended Data Table. 1: Comparison of visual attributes among different types of boundaries:** The visual difference between pre boundary frames and post boundary frames (i.e.,  $B_{\text{post}} - B_{\text{pre}}$ ) was quantified for each property: 1) Luminance: average pixel value of the grayscale image; 2) Contrast: standard deviation across all pixels of the grayscale image<sup>50</sup>; 3) Complexity: JPEG size of an image with a compression quality setting of 80 (on a scale from 1 to 1000)<sup>51</sup>. Simple images are highly compressible, resulting in smaller file size; 4) Entropy: as an additional index of image complexity. It is computed from the histogram distribution of the 8-bit gray-level intensity values. Entropy varies with the “randomness” of the image, with low entropy associated with less complex images; 5) Color distribution: each picture was converted to the CIE L\*A\*B color space, which approximates characteristics of the human visual system<sup>52</sup>. L dimension corresponds to luminance, A and B dimension corresponds to two chromatic channels ranging from red to green, and from blue to yellow, respectively. 6) Higher-level features: the higher-level features of images were quantified as the activations from the layer ‘fc7’ from an AlexNet network<sup>37</sup> trained on the ImageNet data set. The difference of higher-level features was computed as the Euclidean distance between the activation matrices obtained from the post boundary frame and the pre boundary frame. 7) Similarity: the similarity between the post boundary frame and the pre boundary frame was rated by an independent group of Amazon Mechanical Turk workers (n = 30). The rating scale was 0 to 1 (0 = totally different, 1 = identical). The statistical significance was evaluated using one-way ANOVA (Analysis of Variance) test with post-hoc Tukey HSD (Honestly Significant Difference) test.

| Electrode ID | PatientID | Location        | Side  | MNI coordinates |        |        |
|--------------|-----------|-----------------|-------|-----------------|--------|--------|
|              |           |                 |       | X               | Y      | Z      |
| 1            | TWH101    | Hippocampus     | Left  | -23.09          | -14.45 | -18.87 |
| 2            | P64CS     | Hippocampus     | Left  | -22.56          | -5.84  | -16.74 |
| 3            | P60CS     | Hippocampus     | Left  | -30.57          | -16.02 | -14.95 |
| 4            | TWH101    | Hippocampus     | Left  | -28.98          | -18.92 | -14.12 |
| 5            | TWH103    | Hippocampus     | Left  | -23.01          | -17.72 | -13.23 |
| 6            | TWH109    | Hippocampus     | Left  | -21.22          | -18.65 | -11.97 |
| 7            | TWH111    | Hippocampus     | Left  | -26.04          | -20.12 | -15.33 |
| 8            | TWH116    | Hippocampus     | Left  | -27.21          | -17.88 | -14.73 |
| 9            | TWH117    | Hippocampus     | Left  | -30.84          | -20.08 | -11.07 |
| 10           | TWH125    | Hippocampus     | Left  | -20.18          | -18.98 | -19.96 |
| 11           | TWH126    | Hippocampus     | Right | 25.59           | -3.43  | -27.55 |
| 12           | TWH127    | Hippocampus     | Right | 24.94           | -13.49 | -23.44 |
| 13           | P61CS     | Hippocampus     | Right | 30.18           | -10.78 | -18.39 |
| 14           | P62CS     | Hippocampus     | Right | 34.7            | -26.87 | -6.36  |
| 15           | TWH110    | Hippocampus     | Right | 24.74           | -17.67 | -13.86 |
| 16           | TWH111    | Hippocampus     | Right | 26.44           | -17.83 | -14.01 |
| 17           | TWH113    | Hippocampus     | Right | 27.77           | -24.86 | -14.92 |
| 18           | TWH138    | Hippocampus     | Right | 27.01           | -26.45 | -11.18 |
| 19           | TWH125    | Amygdala        | Left  | -20.49          | -3.57  | -16.21 |
| 20           | P64CS     | Amygdala        | Left  | -21.67          | -5.32  | -16.45 |
| 21           | P65CS     | Amygdala        | Left  | -19.19          | -2.97  | -19.11 |
| 22           | TWH103    | Amygdala        | Left  | -16.59          | -4.88  | -20.67 |
| 23           | TWH127    | Amygdala        | Left  | -20.01          | -1.72  | -21.18 |
| 24           | TWH129    | Amygdala        | Left  | -17.96          | -5.21  | -18.36 |
| 25           | P63CS     | Amygdala        | Right | 20.57           | -5.94  | -24.84 |
| 26           | P60CS     | Amygdala        | Right | 24.75           | -1.87  | -20.98 |
| 27           | TWH113    | Amygdala        | Right | 16.82           | -3.86  | -22.04 |
| 28           | TWH117    | Amygdala        | Right | 17.43           | -5.71  | -17.96 |
| 29           | TWH129    | Amygdala        | Right | 20.21           | -4.88  | -11.76 |
| 30           | TWH120    | Amygdala        | Right | 19.01           | -1.82  | -16.13 |
| 31           | P61CS     | Parahippocampus | Left  | -25.81          | -22.86 | -8.64  |
| 32           | TWH109    | Parahippocampus | Left  | -31.01          | -27.01 | -14.12 |
| 33           | TWH113    | Parahippocampus | Left  | -35.77          | -20.97 | -9.12  |
| 34           | TWH116    | Parahippocampus | Left  | -30.72          | -22.83 | -9.25  |
| 35           | TWH120    | Parahippocampus | Left  | -35.79          | -20.99 | -9.11  |
| 36           | TWH125    | Parahippocampus | Left  | -30.72          | -22.83 | -9.12  |
| 37           | TWH127    | Parahippocampus | Right | 26.22           | -34.57 | -9.98  |
| 38           | TWH129    | Parahippocampus | Right | 25.88           | -35.62 | -10.03 |
| 39           | TWH138    | Parahippocampus | Right | 27.11           | -36.63 | -10.57 |

**Extended Data Table. 2: MNI coordinates for electrodes plotted in Figure 1e.**

928  
929  
930

| Patient ID | Subject ID | Age | Gender | Number of detected cells                       |                           |                               |                        |                            |
|------------|------------|-----|--------|------------------------------------------------|---------------------------|-------------------------------|------------------------|----------------------------|
|            |            |     |        | All cells (985)                                | Boundary cell in MTL (42) | Boundary cell outside MTL (8) | Event cell in MTL (36) | Event cell outside MTL (9) |
| P60CS      | 1          | 67  | Male   | 70                                             | 1                         | 1                             | 2                      | 0                          |
| P61CS      | 2          | 52  | Female | 74                                             | 2                         | 0                             | 3                      | 0                          |
| TWH101     | 3          | 25  | Female | 50                                             | 1                         | 0                             | 0                      | 1                          |
| THW103     | 4          | 49  | Male   | 57                                             | 4                         | 1                             | 0                      | 1                          |
| TWH106     | 5          | 26  | Male   | 42                                             | 0                         | 0                             | 0                      | 0                          |
| TWH109     | 6          | 28  | Male   | 49                                             | 3                         | 1                             | 2                      | 1                          |
| TWH110     | 7          | 38  | Male   | 31                                             | 1                         | 0                             | 1                      | 0                          |
| TWH111     | 8          | 63  | Female | 55                                             | 3                         | 1                             | 1                      | 2                          |
| TWH113     | 9          | 36  | Male   | 54                                             | 3                         | 1                             | 3                      | 1                          |
| P62CS      | 10         | 25  | Female | 51                                             | 3                         | 0                             | 2                      | 1                          |
| TWH116     | 11         | 25  | Female | 44                                             | 2                         | 0                             | 1                      | 0                          |
| TWH117     | 12         | 68  | Female | 21                                             | 2                         | 0                             | 0                      | 0                          |
| P64CS      | 13         | 63  | Female | 70                                             | 3                         | 1                             | 3                      | 0                          |
| P65CS      | 19         | 55  | Female | 78                                             | 4                         | 0                             | 5                      | 0                          |
| TWH120     | 15         | 25  | Female | 49                                             | 2                         | 0                             | 2                      | 1                          |
| TWH125     | 15         | 24  | Male   | 51                                             | 3                         | 1                             | 2                      | 1                          |
| TWH126     | 16         | 25  | Male   | 22                                             | 0                         | 0                             | 1                      | 0                          |
| TWH127     | 17         | 28  | Male   | 44                                             | 2                         | 1                             | 2                      | 0                          |
| TWH129     | 18         | 25  | Female | 47                                             | 3                         | 0                             | 4                      | 0                          |
| TWH138     | 19         | 46  | Female | 26                                             | 0                         | 0                             | 2                      | 0                          |
| TWH100     | 20         | 20  | Female | Pyschophysics only, No single neuron recording |                           |                               |                        |                            |

931  
932  
933

**Extended Data Table 3. Subject information.**



| Cell Type            | AMY                            | HPC                            | PHG                            | OFC                           | ACC                          | MCC                          | SMA                          | INS                          |
|----------------------|--------------------------------|--------------------------------|--------------------------------|-------------------------------|------------------------------|------------------------------|------------------------------|------------------------------|
| <b>Boundary cell</b> | 7.10%<br>(12/169)<br>p = 0.009 | 3.50%<br>(12/343)<br>p = 0.036 | 26.47%<br>(18/68)<br>p = 0.001 | 1.59%<br>(3/126)<br>p = 0.158 | 2.13%<br>(2/94)<br>p = 0.103 | 0.00%<br>(0/32)<br>p = 0.638 | 1.45%<br>(1/69)<br>p = 0.232 | 2.38%<br>(2/84)<br>p = 0.089 |
| <b>Event cell</b>    | 4.27%<br>(7/169)<br>p = 0.011  | 7.87%<br>(27/343)<br>p = 0.004 | 2.94%<br>(2/68)<br>p = 0.041   | 6.35%<br>(6/126)<br>p = 0.021 | 2.13%<br>(2/94)<br>p = 0.103 | 0.00%<br>(0/32)<br>p = 0.638 | 0.00%<br>(0/69)<br>p = 0.638 | 1.19%<br>(1/84)<br>p = 0.277 |

934  
935  
936  
937  
938  
939  
940  
941  
942

**Extended Data Table. 4: Distribution of boundary and event cells across brain areas.** Shown is the proportion of all recorded cells that qualified as boundary cells and event cells (AMY: amygdala; HPC: hippocampus; PHG: parahippocampal gyrus; OFC: orbitofrontal; ACC: anterior cingulate cortex; MCC: middle cingulate cortex; SMA: supplementary motor area; INS: insula) and the significance of this proportion against the null distribution (see Methods). Significant entries are marked in gray.

| Corect Target vs Encoding<br>Correlation Coefficient | Boundary aligned |                  | Target aligned |         |
|------------------------------------------------------|------------------|------------------|----------------|---------|
|                                                      | F-number         | P-value          | F-number       | P-value |
| Confidence                                           | 2.56             | > 0.05           | 1.01           | > 0.05  |
| <b>BoundaryType</b>                                  | <b>5.77</b>      | <b>0.007**</b>   | 0.82           | > 0.05  |
| Time distance                                        | 2.04             | > 0.05           | 1.33           | > 0.05  |
| <b>Confidence * BoundaryType</b>                     | <b>9.77</b>      | <b>0.0009***</b> | 0.88           | > 0.05  |
| Confidence * Time distance                           | 3.11             | > 0.05           | 1.11           | > 0.05  |
| BoundaryType * Time distance                         | 2.88             | > 0.05           | 0.56           | > 0.05  |
| <b>Confidence * Distance * BoundaryType</b>          | <b>6.43</b>      | <b>0.013*</b>    | 1.24           | > 0.05  |

  

| Incorrect Target vs Encoding<br>Correlation Coefficient | Boundary aligned |         | Target aligned |         |
|---------------------------------------------------------|------------------|---------|----------------|---------|
|                                                         | F-number         | P-value | F-number       | P-value |
| Confidence                                              | 1.69             | > 0.05  | 0.66           | > 0.05  |
| BoundaryType                                            | 2.78             | > 0.05  | 0.42           | > 0.05  |
| Time distance                                           | 1.84             | > 0.05  | 1.34           | > 0.05  |
| Confidence * BoundaryType                               | 2.21             | > 0.05  | 0.77           | > 0.05  |
| Confidence * Time distance                              | 1.19             | > 0.05  | 1.08           | > 0.05  |
| BoundaryType * Time distance                            | 2.03             | > 0.05  | 0.59           | > 0.05  |
| Confidence * Distance * BoundaryType                    | 1.55             | > 0.05  | 1.53           | > 0.05  |

  

| Correct Foil vs Encoding<br>Correlation Coefficient | Boundary aligned |         | Target aligned |         |
|-----------------------------------------------------|------------------|---------|----------------|---------|
|                                                     | F-number         | P-value | F-number       | P-value |
| Confidence                                          | 2.26             | > 0.05  | 0.92           | > 0.05  |
| Boundary Type                                       | 2.79             | > 0.05  | 0.77           | > 0.05  |
| Similarity                                          | 2.48             | > 0.05  | 1.69           | > 0.05  |
| Confidence * BoundaryType                           | 1.12             | > 0.05  | 0.64           | > 0.05  |
| Confidence * Similarity                             | 1.78             | > 0.05  | 0.69           | > 0.05  |
| BoundaryType * Similarity                           | 1.43             | > 0.05  | 0.64           | > 0.05  |
| Confidence * Similarity * BoundaryType              | 2.09             | > 0.05  | 1.44           | > 0.05  |

  

| Incorrect Foil vs Encoding<br>Correlation Coefficient | Boundary aligned |                 | Target aligned |         |
|-------------------------------------------------------|------------------|-----------------|----------------|---------|
|                                                       | F-number         | P-value         | F-number       | P-value |
| Confidence                                            | 2.47             | > 0.05          | 0.89           | > 0.05  |
| <b>Boundary Type</b>                                  | <b>5.12</b>      | <b>0.011*</b>   | 0.69           | > 0.05  |
| <b>Similarity</b>                                     | <b>6.69</b>      | <b>0.004**</b>  | 1.97           | > 0.05  |
| <b>Confidence * BoundaryType</b>                      | <b>7.12</b>      | <b>0.003**</b>  | 0.72           | > 0.05  |
| Confidence * Similarity                               | 2.11             | > 0.05          | 0.65           | > 0.05  |
| BoundaryType * Similarity                             | 1.33             | > 0.05          | 0.74           | > 0.05  |
| <b>Confidence * Similarity * BoundaryType</b>         | <b>9.19</b>      | <b>0.0021**</b> | 1.37           | > 0.05  |

943  
944  
945  
946  
947  
948  
949  
950  
951  
952

**Extended Data Table. 5: ANOVA test with the reinstatement of neural context at boundaries and targets, Related to Figure 6.** Statistical numbers (i.e., F-numbers and p-values) for correlation values (as shown in Fig. 6e-h, averaged within [0,1] seconds relative to boundaries or when target presented in the clip) covaried with independent variables (Confidence: high, medium, low; BoundaryType: NB, SB, HB; Time distance: relative distances between targets and boundaries in [0,1], [1,2], [2,3], [3,4] seconds; Similarity: similarity ratings between foils and their corresponding targets) and their interaction terms. Significant main effects or interactions are marked in gray. \* $P < 0.05$ , \*\* $P < 0.01$ , \*\*\* $P < 0.001$ .

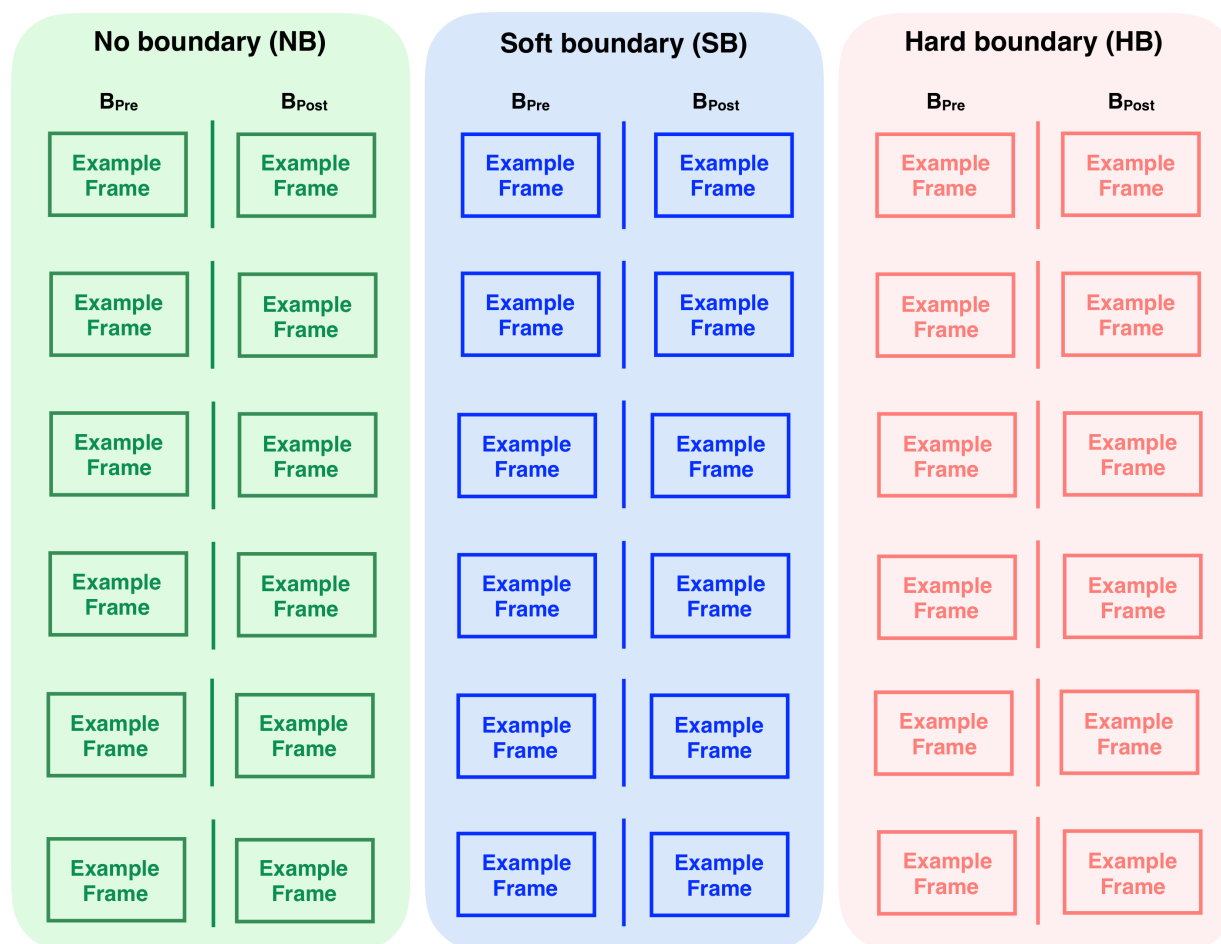

953  
954  
955  
956  
957  
958  
959  
960  
961

**Extended Data Fig. 1: Examples of the three different types of boundaries:** Six examples showing the frame before (pre) and after (post) the middle of the clip (NB, green) or the frame before and after soft boundaries (SB, blue, cuts between different shots of the same movie), or hard boundaries (HB, red, cut between shots from different movies). Note that owing to copyright issues, all original images have been removed but available upon reasonable request.

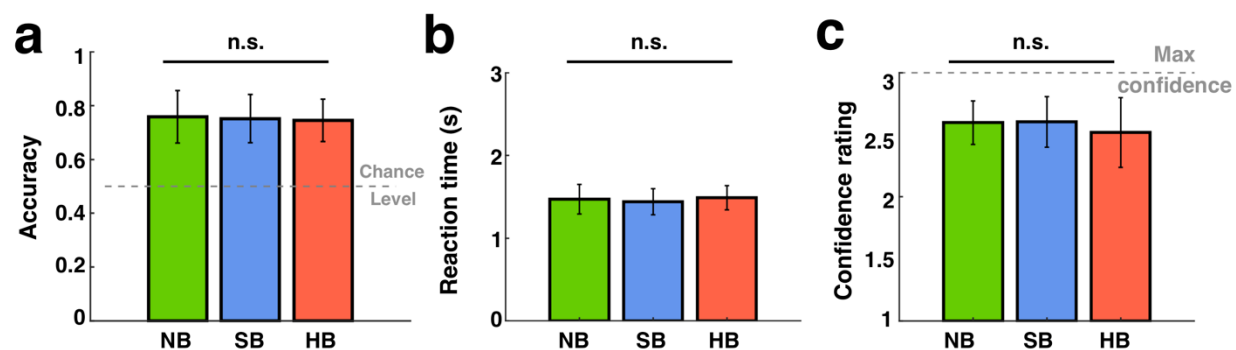

962  
963  
964  
965  
966  
967  
968  
969  
970  
971

**Extended Data Fig. 2: Subjects' performance in the scene recognition task did not differ significantly across different boundary types. (a-c)** Behavior quantified by accuracy (a), response time (b), and confidence level (c) across all trials. Results are shown for boundary type NB (green), SB (blue), and HB (red) during the scene recognition task. The horizontal dashed lines in (a) show chance levels (0.5) and in (c) show the maximum possible confidence value (3=high confidence). Error bars indicate standard deviation across  $n = 20$  sessions. One-way ANOVA between NB/SB/HB, degrees of freedom = (2, 57).

972

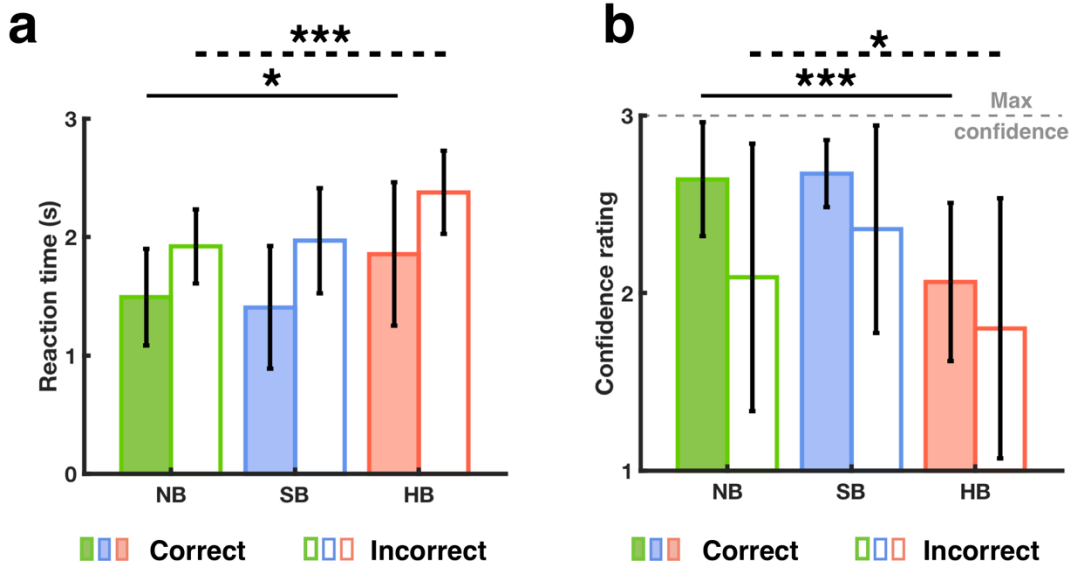

973

974

975

976

977

978

979

980

981

982

983

984

985

986

987

988

989

990

**Extended Data Fig. 3: Longer reaction time and lower confidence level for HB compared to SB and NB, regardless of whether the clips' temporal orders were remembered or forgotten. (a-b) Behavior quantified by response time (a) and confidence level (b) during the time discrimination task for clips whose temporal order were remembered (color filled) vs. forgotten (empty). Results are shown for boundary type NB (green), SB (blue), and HB (red). The horizontal dashed line in (b) show the maximum possible confidence value (3 = high confidence). For both correct (color filled) and incorrect trials (empty), subjects showed longer reaction times (a; Correct trials: HB =  $1.86 \pm 0.61$  seconds, NB =  $1.49 \pm 0.41$  seconds, SB =  $1.40 \pm 0.52$  seconds,  $F(2, 57) = 4.29$ ,  $p = 0.02$ ; Incorrect trials:  $2.38 \pm 0.35$  seconds, NB =  $1.92 \pm 0.31$  seconds, SB =  $1.96 \pm 0.44$  seconds,  $F(2, 57) = 9.06$ ,  $p = 3.84 \times 10^{-4}$ ) and lower confidence ratings (b; Correct trials: HB =  $2.06 \pm 0.45$ , NB =  $2.64 \pm 0.32$ , SB =  $2.67 \pm 0.19$ ,  $F(2, 57) = 21.02$ ,  $p = 1.45 \times 10^{-7}$ ; Incorrect trials: HB =  $1.80 \pm 0.73$ , NB =  $2.09 \pm 0.75$ , SB =  $2.35 \pm 0.58$ ,  $F(2, 57) = 3.23$ ,  $p = 0.04$ ) when discriminating between two frames earlier separated by a HB compared to SB and NB. Error bars indicate standard deviation across  $n = 20$  subjects.  $*P < 0.05$ ,  $***P < 0.001$ , one-way ANOVA between NB/SB/HB, degrees of freedom = (2, 57).**

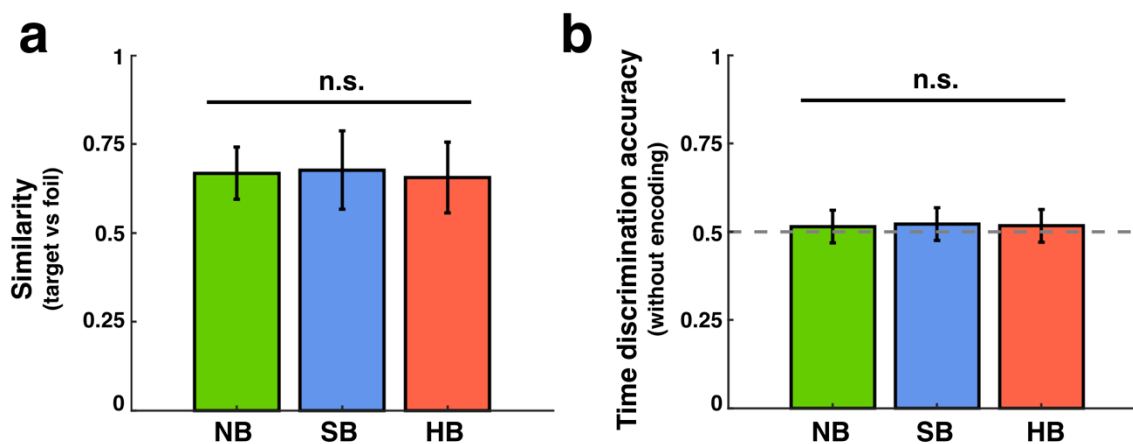

991  
992  
993  
994  
995  
996  
997  
998  
999  
1000

**Extended Data Fig. 4: Boundary effect on time discrimination was not driven by the difficulty of scene recognition and pure reasoning.** **a**, Similarity between corresponding target and foil frames used in the scene recognition task, ranging from 0 (totally different) to 1 (identical) as rated by an independent group of Amazon Mechanical Turk workers ( $n = 30$ ). **b**, Time discrimination accuracy by an independent group of Amazon Mechanical Turk workers ( $n = 30$ ) who did not watch the clips. Error bars indicate standard deviation across  $n=30$  subjects. One-way ANOVA, degrees of freedom = (2, 87).

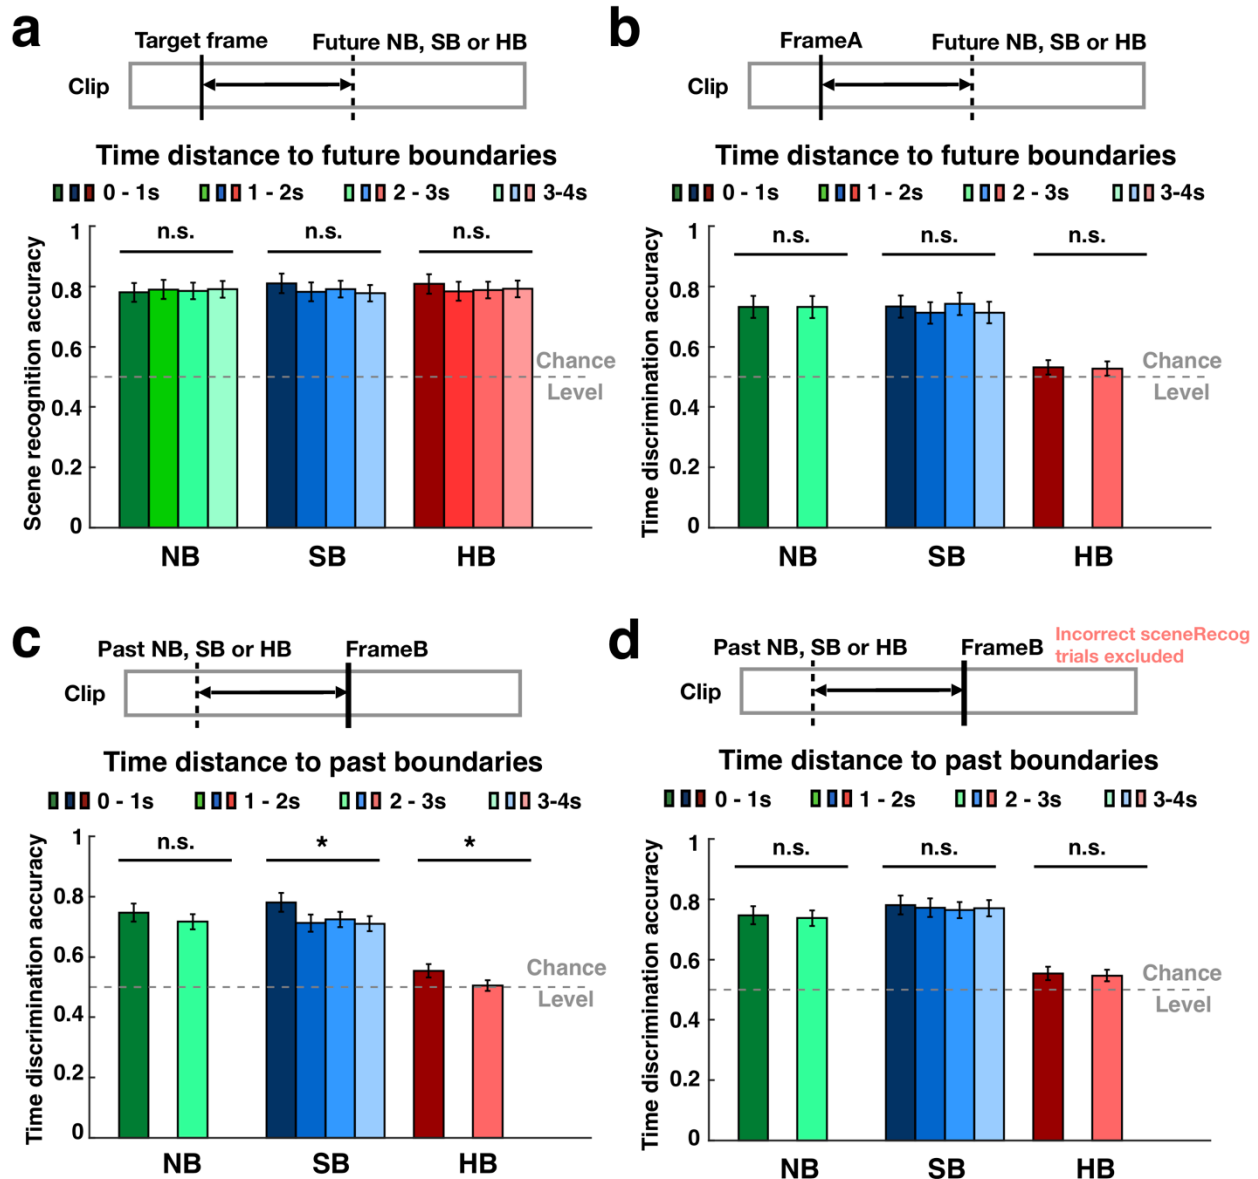

1001  
1002 **Extended Data Fig. 5: Scene recognition and time discrimination accuracy were not**  
1003 **modulated by the distance between target and future boundaries:** a. Expanding on the  
1004 results in Fig. 2d, scene recognition accuracy for target frames grouped by the time elapsed  
1005 between the target and the *future* boundary (note that Fig. 2d showed time elapsed from the *past*  
1006 boundary). b. time discrimination accuracy grouped by the time elapsed between the target frame  
1007 A and the *future* boundary. c. time discrimination accuracy grouped by the time elapsed between  
1008 the target frame B and the *past* boundary. d. time discrimination accuracy grouped by the time  
1009 elapsed between the target frame A and the *past* boundary *but excluding clips with incorrect*  
1010 *scene recognition*. In b-d, there were no tested frames within [1,2] or [3,4] seconds from the NB  
1011 and HB clips. Error bars indicate standard deviation across n = 20 subjects. \* $P < 0.05$ , one-way  
1012 ANOVA, degrees of freedom = (3, 76) in a; degree of freedom = (1, 38) in b-d for NB and HB and  
1013 degrees of freedom = (3, 76) for SB.  
1014

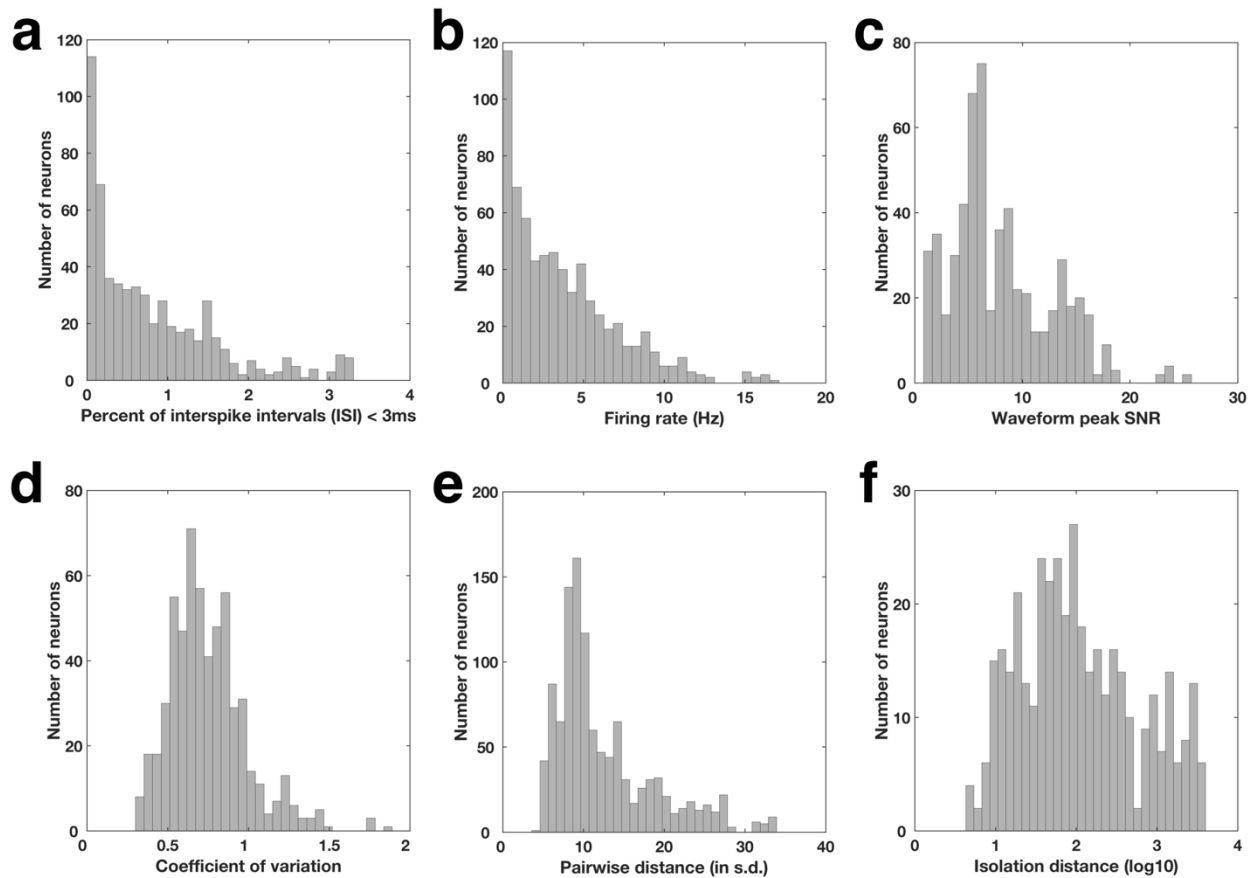

1015  
1016  
1017  
1018  
1019  
1020  
1021  
1022  
1023  
1024  
1025  
1026  
1027  
1028  
1029

**Extended Data Fig. 6: Spike sorting quality metrics for all identified putative single cells:**  
**a**, Histogram of proportion of inter-spike intervals (ISI) that were shorter than 3ms ( $0.80\% \pm 0.80\%$ , mean  $\pm$  s.d.). **b**, Histogram of average firing rate within the entire recording session for all identified putative single cells ( $3.74 \pm 3.34$  Hz, mean  $\pm$  s.d.). **c**, Histogram of waveform peak signal-to-noise ratio (SNR), which is the ratio between the peak amplitude of the mean waveform and the s.d. of the noise of each identified putative single cell ( $8.00 \pm 4.73$ , mean  $\pm$  s.d.). **d**, Histogram of coefficient-of-variation (CV2) in the ISI for each identified putative single cell ( $0.74 \pm 0.24$ , mean  $\pm$  s.d.). **e**, Histogram of the pairwise isolation distance between putative single cells identified from the same wire (projection test;  $12.44 \pm 6.18$  s.d. of the signal,). **f**, Histogram of isolation distance across all identified putative single cells that was calculated in a ten-dimensional feature space of the energy normalized waveforms<sup>42</sup>. These quality metrics are comparable to previous published works in the field<sup>40,41,53</sup>.



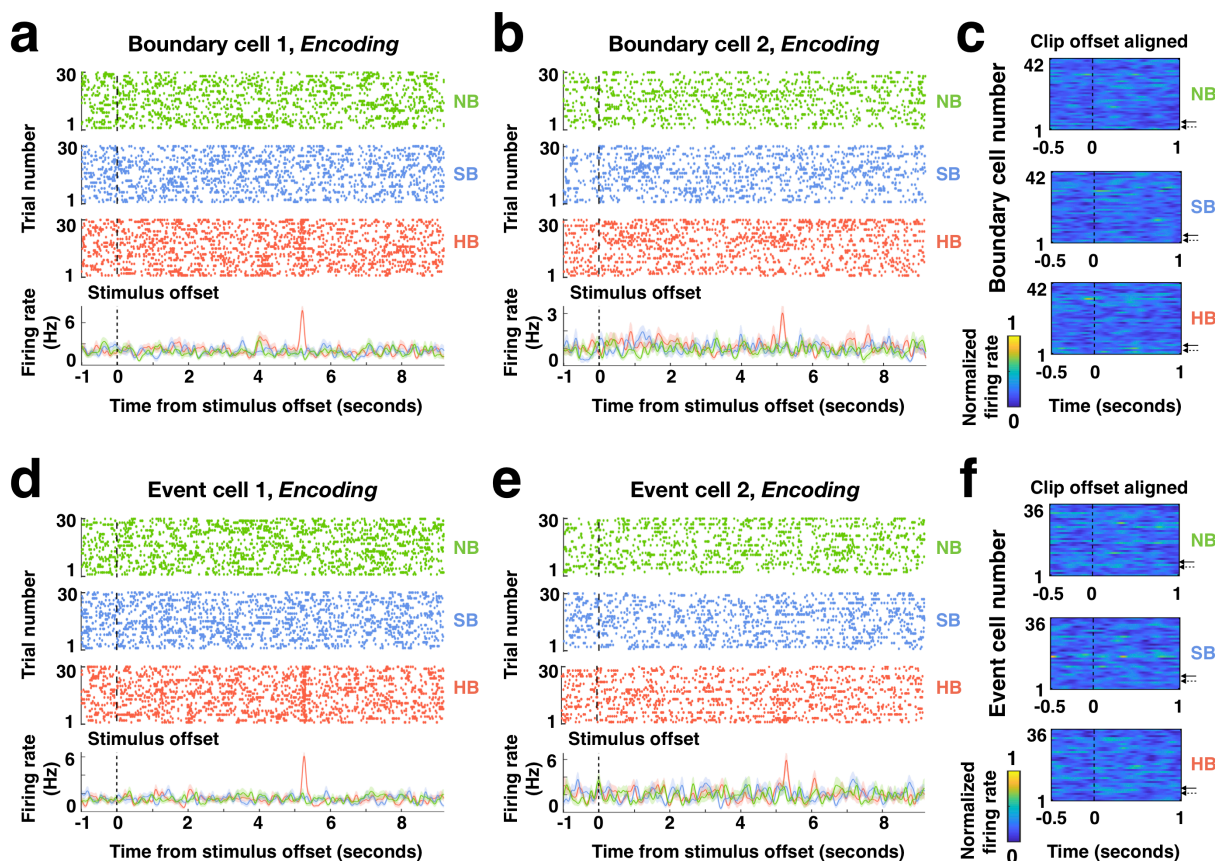

1030  
1031  
1032  
1033  
1034  
1035  
1036  
1037  
1038  
1039  
1040  
1041  
1042  
1043  
1044

**Extended Data Fig. 7: Boundary cells and event cells do not respond to clip offsets: a-b,** Responses during the encoding stage from the same example boundary cells shown in **Fig.3a-b** aligned to the clip offsets. **c,** Firing rates of all 42 boundary cells (solid and dashed arrows denote the examples in **a** and **b**, respectively) during the encoding stage aligned to the clip offsets, averaged over trials within each boundary type and normalized to each neuron's maximum firing rate throughout the entire task (see color scale on bottom). **d-e,** Responses during the encoding stage from the same example boundary cells shown in **Fig.3e-f** aligned to the clip offsets. Same format as **a-b.** **f,** Firing rates of all 36 event cells (solid and dashed arrows denote the examples in **d** and **e**, respectively) during the encoding stage, using the same format as **c.** For **a, b, d, e,** Top: raster plot color coded for different boundary types (green: NB; blue: SB; red: HB). Bottom: Post-stimulus time histogram (bin size = 200ms, step size = 2ms, shaded areas represented  $\pm$  s.e.m. across trials). Black dashed lines indicate clip offsets.

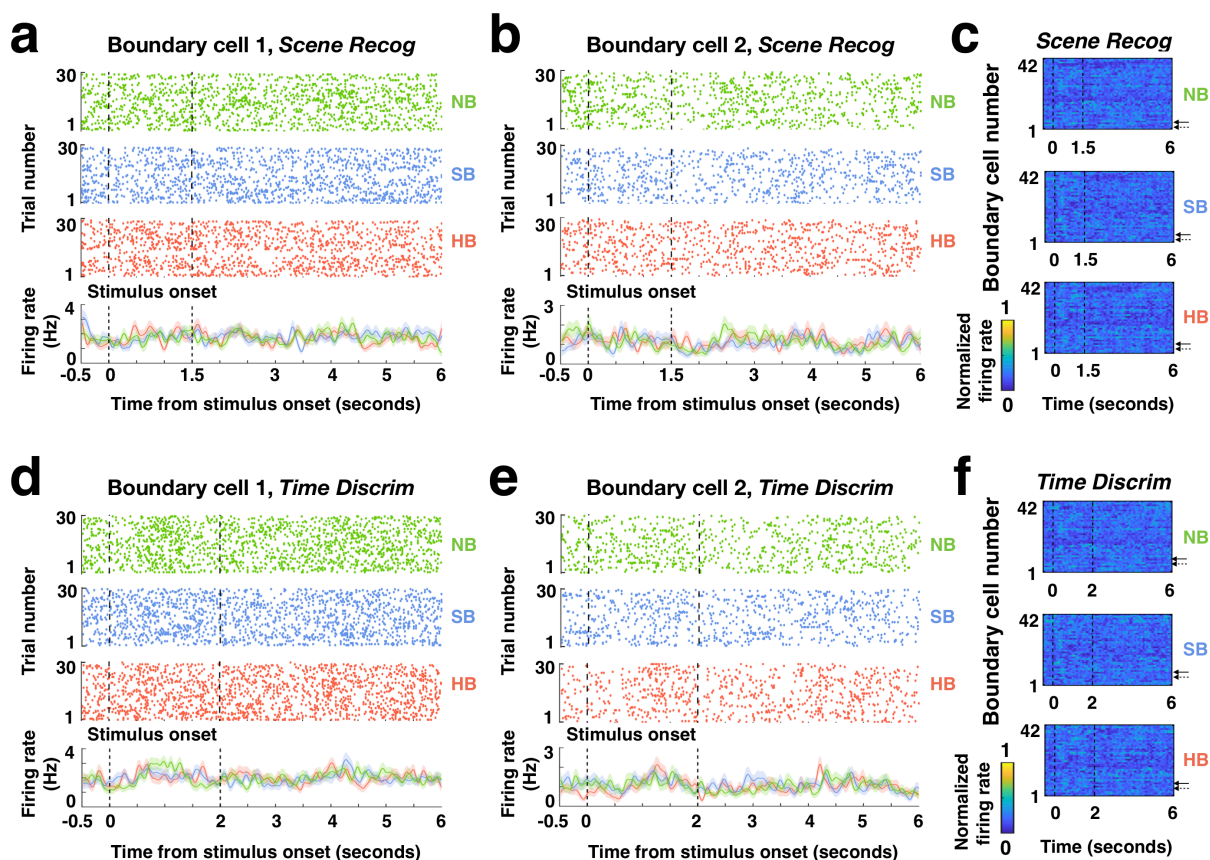

1045  
 1046  
 1047  
 1048  
 1049  
 1050  
 1051  
 1052  
 1053  
 1054  
 1055  
 1056  
 1057  
 1058  
 1059  
 1060  
 1061

**Extended Data Fig. 8: Responses of boundary cells during scene recognition and time discrimination:** **a-b**, Responses during the scene recognition stage from the same example boundary cells shown in **Fig.3a-b** aligned to the stimulus onsets. **c**, Firing rates of all 42 boundary cells (solid and dashed arrows denote the examples in **a** and **b**, respectively) during the scene recognition aligned to the stimulus onsets, averaged over trials within each boundary type and normalized to each neuron's maximum firing rate throughout the entire task (see color scale on bottom). **d-e**, Responses during the time discrimination stage from the same example boundary cells shown in **Fig.3e-f** aligned to the stimulus onsets. Same format as **a-b**. **f**, Firing rates of all 42 boundary cells (solid and dashed arrows denote the examples in **d** and **e**, respectively) during the time discrimination stage, using the same format as **c**. For **a, b, d, e**, Top: raster plot color coded for different boundary types (green: NB; blue: SB; red: HB). Bottom: Post-stimulus time histogram (bin size = 200ms, step size = 2ms, shaded areas represented  $\pm$  s.e.m. across trials). Black dashed lines indicate stimulus onsets and offsets.

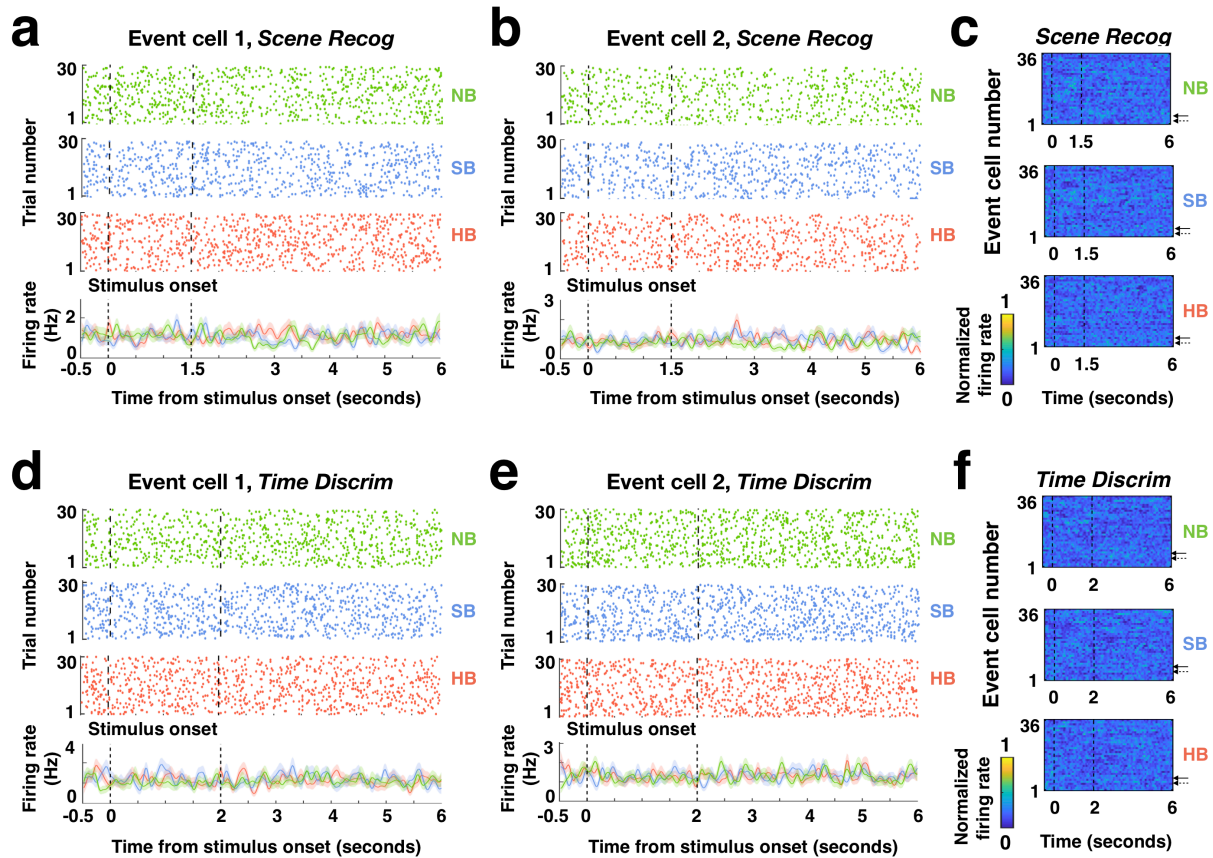

1062  
1063  
1064  
1065  
1066  
1067  
1068  
1069  
1070  
1071  
1072  
1073  
1074  
1075  
1076  
1077

**Extended Data Fig. 9: Responses of event cells during scene recognition and time discrimination tasks:** **a-b**, Responses during the scene recognition stage from the same example event cells shown in **Fig.3e-f** aligned to the stimulus onsets. **c**, Firing rates of all 36 event cells (solid and dashed arrows denote the examples in **a** and **b**, respectively) during the scene recognition aligned to the stimulus onsets, averaged over trials within each boundary type and normalized to each neuron's maximum firing rate throughout the entire task (see color scale on bottom). **d-e**, Responses during the time discrimination stage from the same example event cells shown in **Fig.3e-f** aligned to the stimulus onsets. Same format as **a-b**. **f**, Firing rates of all 36 event cells (solid and dashed arrows denote the examples in **d** and **e**, respectively) during the time discrimination stage, using the same format as **c**. For **a, b, d, e**, Top: raster plot color coded for different boundary types (green: NB; blue: SB; red: HB). Bottom: Post-stimulus time histogram (bin size = 200ms, step size = 2ms, shaded areas represented  $\pm$  s.e.m. across trials). Black dashed lines indicate stimulus onsets and offsets.

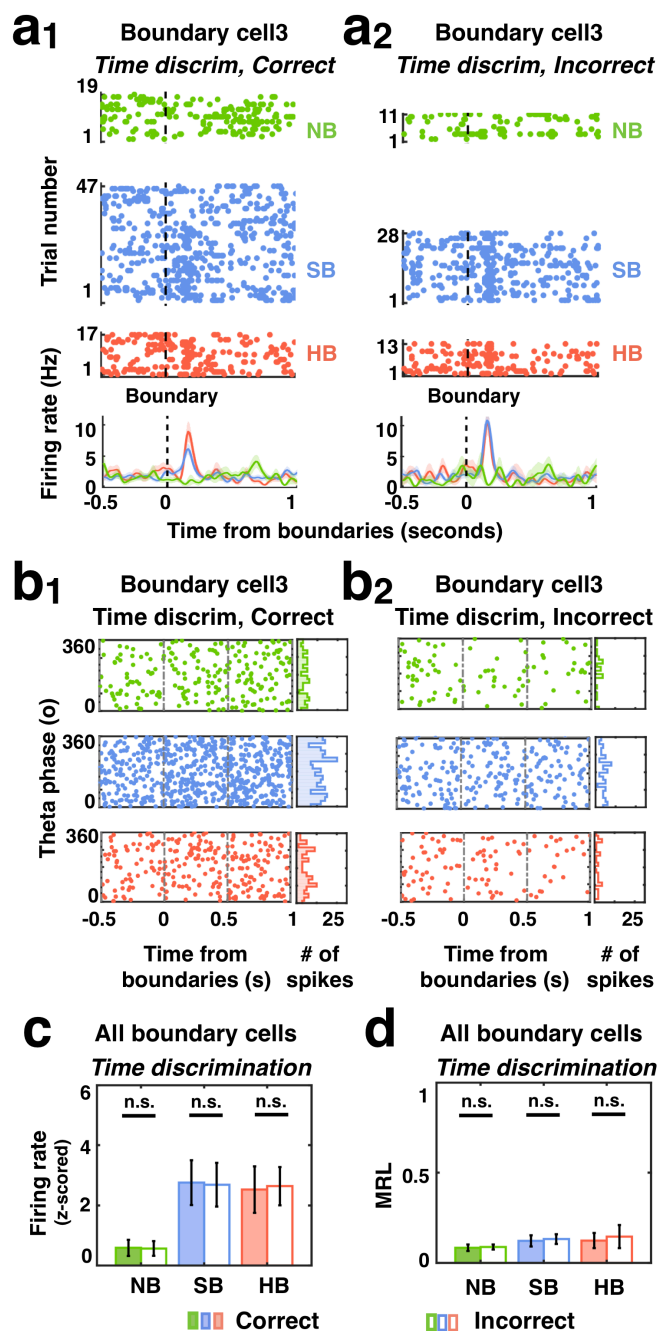

1078  
 1079 **Extended Data Fig. 10: Responses of boundary cells during encoding grouped by memory**  
 1080 **outcomes from the time discrimination task.** **a<sub>1</sub>-a<sub>2</sub>.** Response of the same example boundary  
 1081 cell in **Fig. 4a-b**. During encoding, this cell responded to SB and HB transitions regardless of  
 1082 whether the temporal order of the clip was later correctly (**a<sub>1</sub>**) or incorrectly (**a<sub>2</sub>**) recalled in the time  
 1083 discrimination task. **b<sub>1</sub>-b<sub>2</sub>.** Left: timing of spikes from the same boundary cell shown in **a<sub>1</sub>-a<sub>2</sub>**  
 1084 relative to theta phase calculated from the local field potentials, for clips whose temporal orders  
 1085 were later correctly (**b<sub>1</sub>**) or incorrectly (**b<sub>2</sub>**) recalled. Right: phase distribution of spike times in the  
 1086 1s period following the middle of the clip (NB) or boundary (SB, HB) for clips whose temporal  
 1087 orders were later correctly (**b<sub>1</sub>**) or incorrectly (**b<sub>2</sub>**) recalled. **c-d.** Population summary for all 42  
 1088 boundary cells. **c.** Z-scored firing rate (0-1s after boundaries during encoding) for each boundary  
 1089 type did not differ significantly between clips whose temporal orders were later correctly (color

1090 filled) vs. incorrectly (empty) recalled. **d.** Mean resultant length (MRL) of spike times (relative to  
1091 theta phases, 0-1s after boundaries during encoding) across all boundary cells for each boundary  
1092 type did not differ significantly between clips whose temporal orders were later correctly (color  
1093 filled) vs. incorrectly (empty) recalled. Error bars indicate standard deviation across  $n = 42$  cells,  
1094 one-way ANOVA, degrees of freedom = (1, 82).  
1095

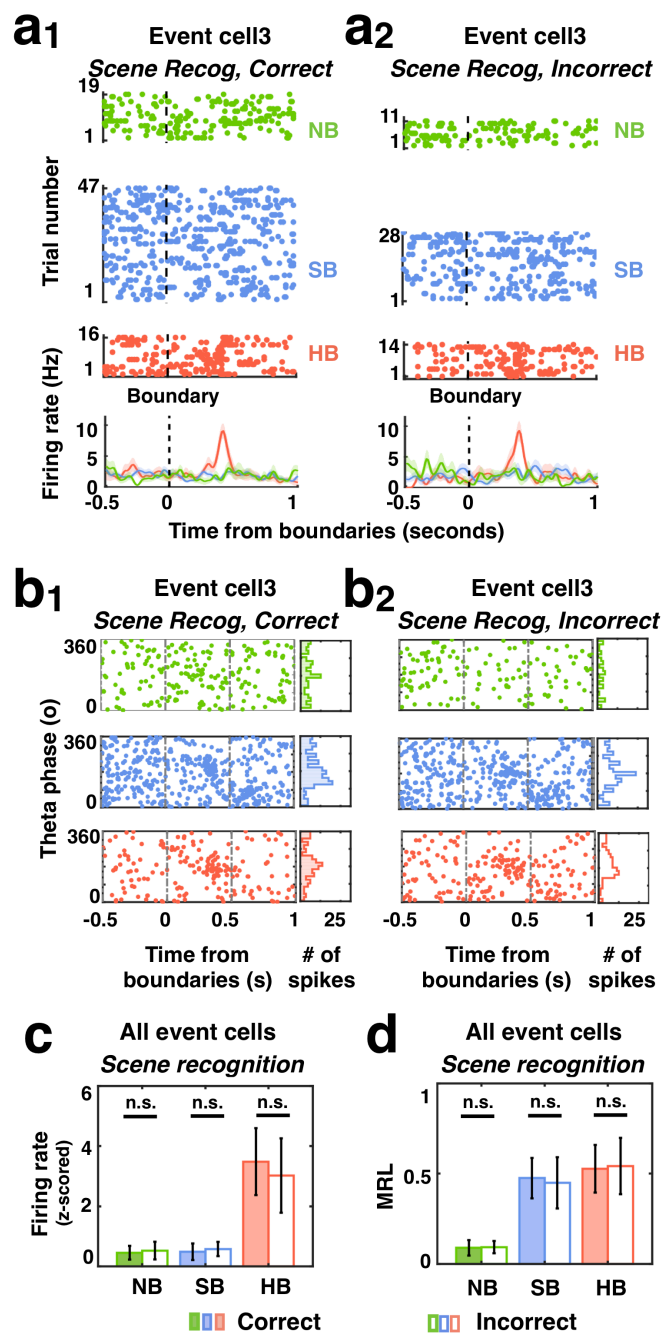

1096  
1097  
1098 **Extended Data Fig. 11: Responses of event cells during encoding grouped by memory**  
1099 **outcomes from the scene recognition stage.** **a<sub>1</sub>-a<sub>2</sub>.** Response of the same example event cell  
1100 in **Fig. 4e-f**. During encoding, this cell responded to HB transitions regardless of whether frames  
1101 were later correctly (**a<sub>1</sub>**) or incorrectly (**a<sub>2</sub>**) recognized in the scene recognition task. **b<sub>1</sub>-b<sub>2</sub>.** Left:  
1102 timing of spikes from the same event cell shown in **a<sub>1</sub>-a<sub>2</sub>** relative to theta phase calculated from  
1103 the local field potentials, for frames that were later correctly (**b<sub>1</sub>**) or incorrectly (**b<sub>2</sub>**) recognized.  
1104 Right: phase distribution of spike times in the 1s period following the middle of the clip (NB) or  
1105 boundary (SB, HB) for frames that were later correctly (**b<sub>1</sub>**) or incorrectly (**b<sub>2</sub>**) recognized. **c-d.**  
1106 Population summary for all 36 event cells. **c.** Z-scored firing rate (0-1s after boundaries during  
1107 encoding) for each boundary type did not differ significantly between frames that were later  
correctly (color filled) vs. incorrectly (empty) recognized. **d.** Mean resultant length (MRL) of spike

1108 times (relative to theta phases, 0-1s after boundaries during encoding) across all event cells for  
1109 each boundary type did not differ significantly between frames that were later correctly (color filled)  
1110 vs. incorrectly (empty) recognized. Error bars indicate standard deviation across  $n = 36$  cells, one-  
1111 way ANOVA, degree of freedom = (1, 70).  
1112

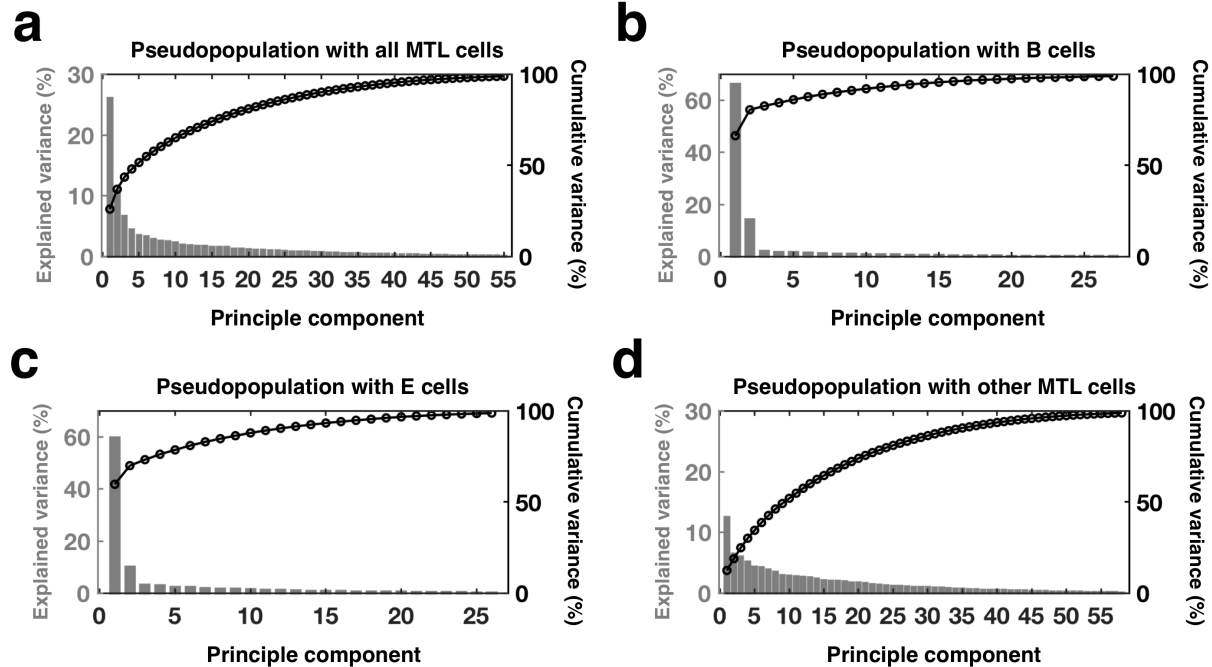

1113  
1114  
1115  
1116  
1117  
1118  
1119  
1120  
1121

**Extended Data Fig. 12: Percentage of explained variance in reconstructed principal component space.** Percent variance explained by top principal components (PC) for neural activity from (a) all MTL cells, (b) boundary cells, (c) event cells and (d) other MTL cells (i.e., non-boundary/event cells in the MTL). Each bar contains information about the proportion of variance of each and each line denotes the cumulative variances. Full variance (100%) was carried in top 55 PCs in (a), top 27 PCs in (b) and top 26 PCs in (c) and top 58 PCs in (d).



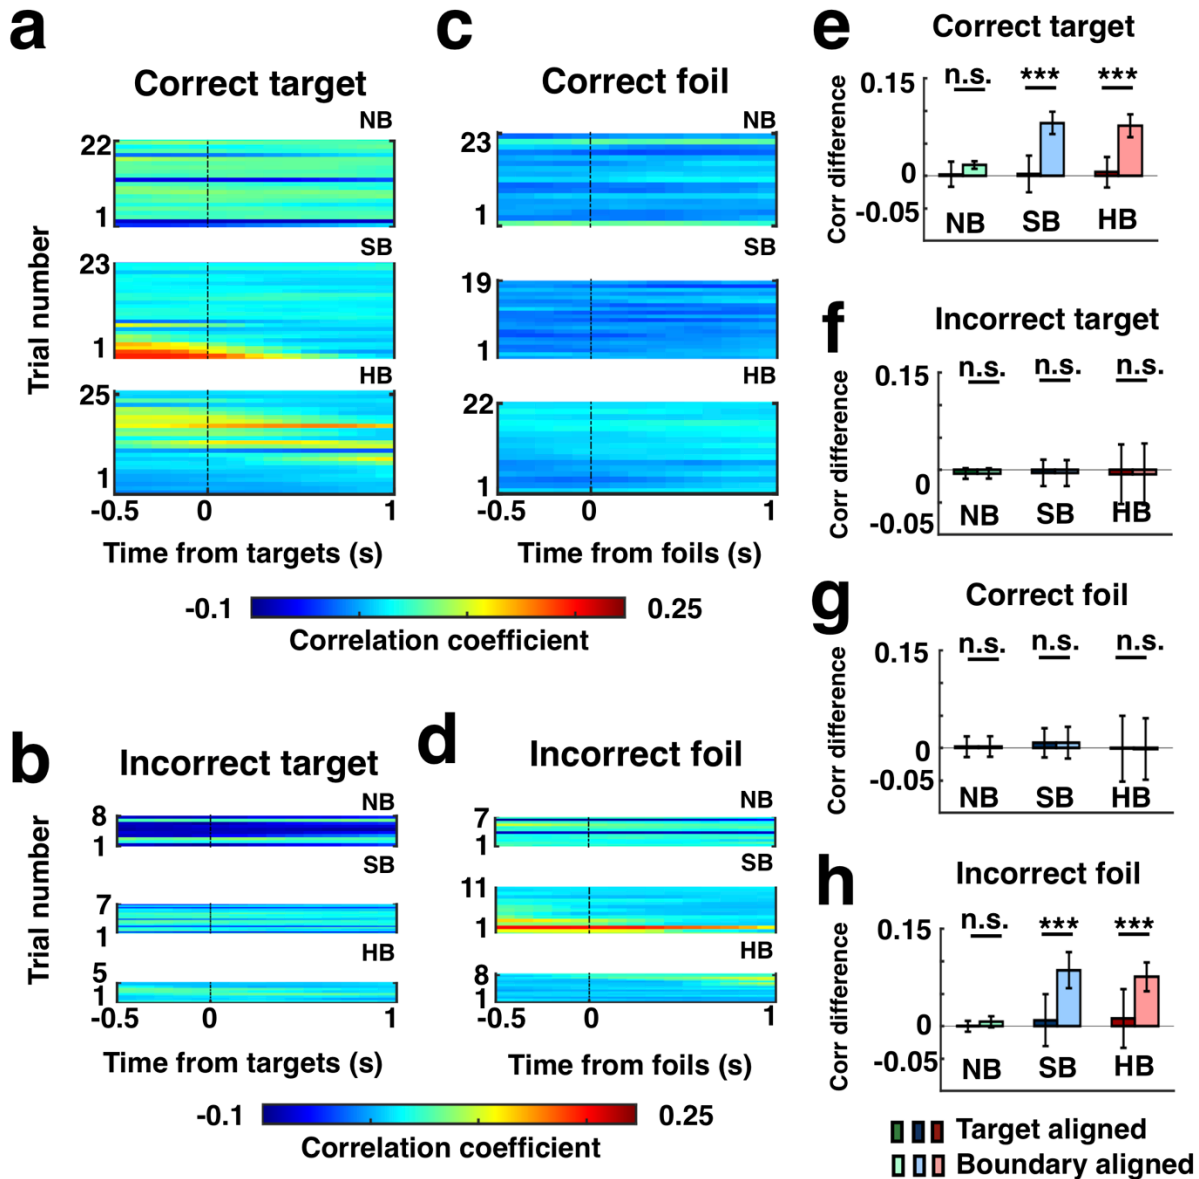

1122  
1123  
1124  
1125  
1126  
1127  
1128  
1129  
1130  
1131  
1132  
1133  
1134  
1135  
1136  
1137

**Extended Data Fig. 13: Stronger reinstatement of neural context at boundaries than target:** **a-d.** Example subject (same subject as in **Fig 6a-d**) showing trial-by-trial correlation between the population responses during the scene recognition task (0-1.5s relative to stimulus onsets) and during the encoding period (sliding window of 1.5s and 200ms step size), aligned to the target time (time = 0s) for correctly recognized (**a-c**) or incorrectly recognized (**b-d**) target or for foil trials, the time in the clip of their corresponding targets (see Methods). These plots are identical to **Fig. 6a-d**, except here  $t=0$  is where the target was rather than the boundary. **e-h.** Difference of correlation coefficients between [0 1]s and [-1 0]s intervals with respect to targets (dark) or boundaries (light) for each boundary type (green: NB; blue: SB; red: HB), as shown in part **a-d**, then averaged across all the subjects for correctly recognized (**e, g**) or incorrectly recognized (**f, h**) target or foil trials. Error bars indicate standard deviation across  $n = 19$  subjects.  $***P < 0.001$ , one-way ANOVA, degrees of freedom = (1, 36).
